# Supplementary material
Source: PubMed Central journal article supplement (PMC10591924)
Supplement: NIHMS1933805-supplement-Supporting_Information.pdf [file NIHMS1933805-supplement-Supporting_Information.pdf]

## Supporting Information

### Difluoromethyl-1,3,4-oxadiazoles are selective, mechanism-based, and essentially irreversible inhibitors of histone deacetylase 6

Beate König,<sup>1,2</sup> Paris R. Watson,<sup>2</sup> Nina Reßing,<sup>1</sup> Abigail D. Cragin,<sup>2</sup> Linda Schäker-Hübner,<sup>1</sup> David W. Christianson<sup>\*2</sup> and Finn K. Hansen<sup>\*1</sup>

<sup>1</sup> Department of Pharmaceutical and Cell Biological Chemistry, Pharmaceutical Institute, University of Bonn, 53121 Bonn, Germany.

<sup>2</sup> Roy and Diana Vagelos Laboratories, Department of Chemistry, University of Pennsylvania, 231 South 34th Street, Philadelphia, Pennsylvania 19104-6323, United States.

Corresponding authors:

F.K.H.: E-mail, finn.hansen@uni-bonn.de

D.W.C: E-Mail: chris@sas.upenn.edu

#### Content

|                                                              |     |
|--------------------------------------------------------------|-----|
| 1 Supplementary Schemes, Figures, Equations and Tables ..... | S2  |
| 2 NMR Data of synthesized compounds .....                    | S10 |
| 3 HPLC Chromatograms .....                                   | S39 |
| 4 References .....                                           | S44 |

## 1 Supplementary Schemes, Figures, Equations and Tables

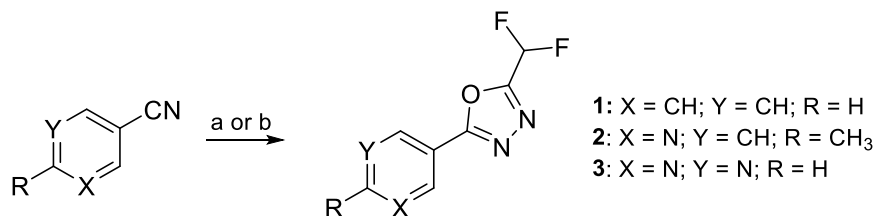

**Scheme S1.** Synthesis of HDAC6 inhibitor fragments. a) i: NaN<sub>3</sub>, NH<sub>4</sub>Cl, LiCl·H<sub>2</sub>O, DMF, 100 °C, 150 W, 24 h; ii: DFAA, DCM, rt., 24 h (**1**, **3**); b) i: NaN<sub>3</sub>, NH<sub>4</sub>Cl, LiCl, DMF, 100 °C, 18 h; ii: difluoroacetic anhydride (DFAA), toluene, 70 °C, 18 h (**2**).

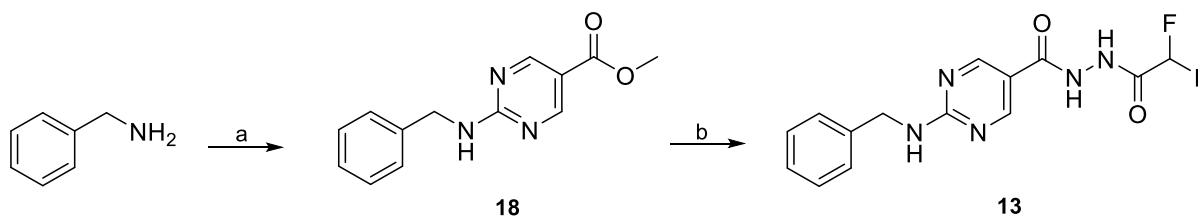

**Scheme S2.** Synthesis of the acylhydrazide **13**. a) Methyl 2-chlorpyrimidine-5-carboxylate, DIPEA, EtOH, 90 °C, 18 h; b) i: hydrazine monohydrate, MeOH, 70 °C, 3 h; ii: DFAA, DMF, 70 °C, 1 h.

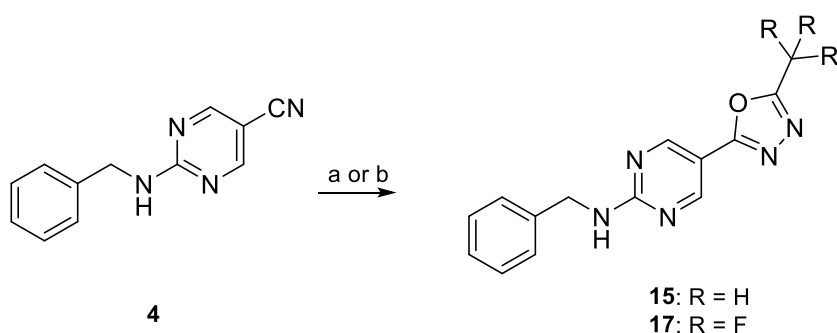

**Scheme S3.** Synthesis of the trifluoromethyl-1,3,4-oxadiazole (**17**) and methyl-1,3,4-oxadiazole (**15**) analogs. a) i: NaN<sub>3</sub>, NH<sub>4</sub>Cl, LiCl, DMF, 100 °C, 18 h; ii: trifluoroacetic anhydride, toluene, 70 °C, 18 h (**14**); b) i: NaN<sub>3</sub>, NH<sub>4</sub>Cl, LiCl, DMF, 100 °C, 18 h; ii: acetic anhydride, toluene, 70 °C, 18 h; iii: K<sub>2</sub>CO<sub>3</sub>, MeOH/H<sub>2</sub>O (**15**).

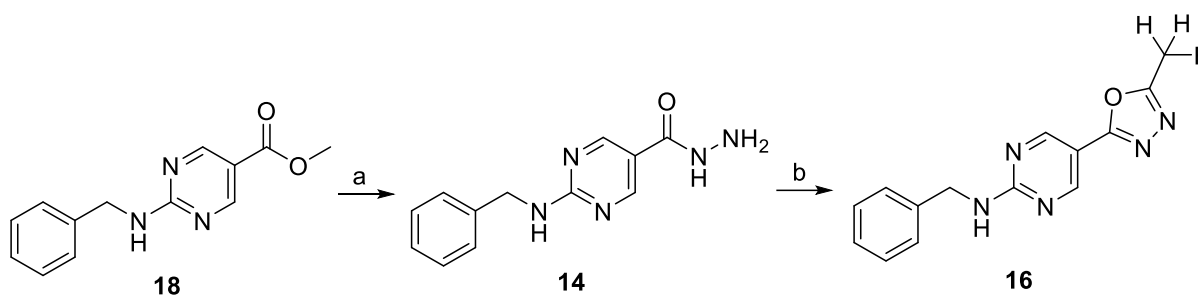

**Scheme S4.** Synthesis of hydrazide **14** and monofluoromethyl-1,3,4-oxadiazole **16**. a) hydrazine monohydrate, MeOH, 70 °C, 3 h; b) i: monofluoroacetic acid, DMF, 70 °C, 3 h; ii: Burgess reagent, THF, 60 °C, 18 h.

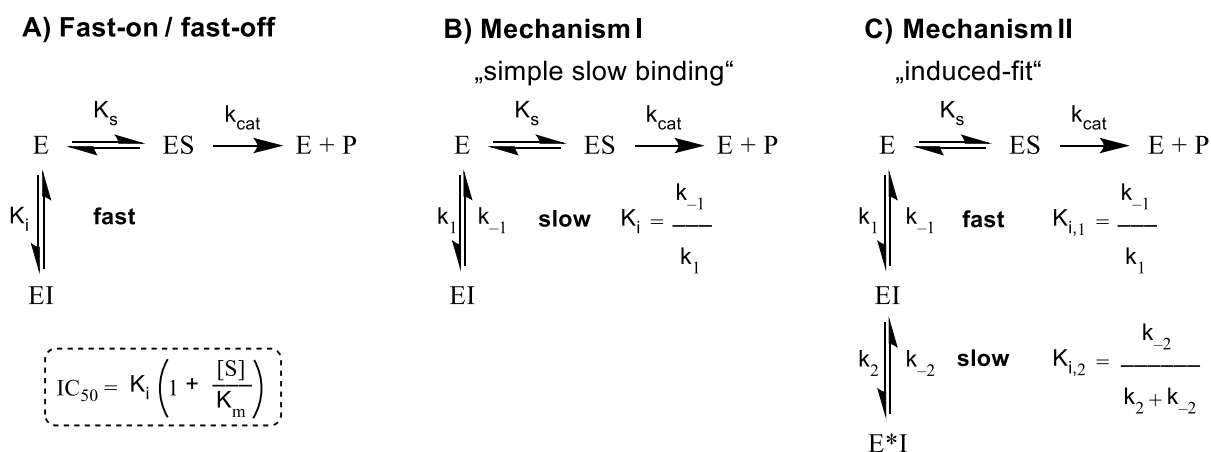

**Figure S1.** Representative examples of different kinetic mechanisms of enzyme inhibition, including the relationships between the respective association and dissociation rate constants (e. g.,  $k_1$  &  $k_{-1}$ ) and the related equilibrium dissociation constant  $K_i$ . **A)** Fast-on/fast-off binding kinetics. For competitive fast-on/fast-off inhibitors the half maximum inhibitory concentration ( $IC_{50}$ ) and the  $K_i$  are directly related by the Cheng-Prusoff equation<sup>1</sup>; **B)** slow-binding Mechanism I: single-step slow binding,  $k_1$  &  $k_{-1}$  are inherently slow; **C)** slow-binding Mechanism II: two-step slow binding. Initially, inhibitor and enzyme form an encounter complex [EI] that subsequently slowly undergoes isomerization to a binary enzyme inhibitor complex [E\*I].<sup>2</sup>

## HDAC6 Michaelis-Menten $K_M = 19.27 \mu\text{M}$

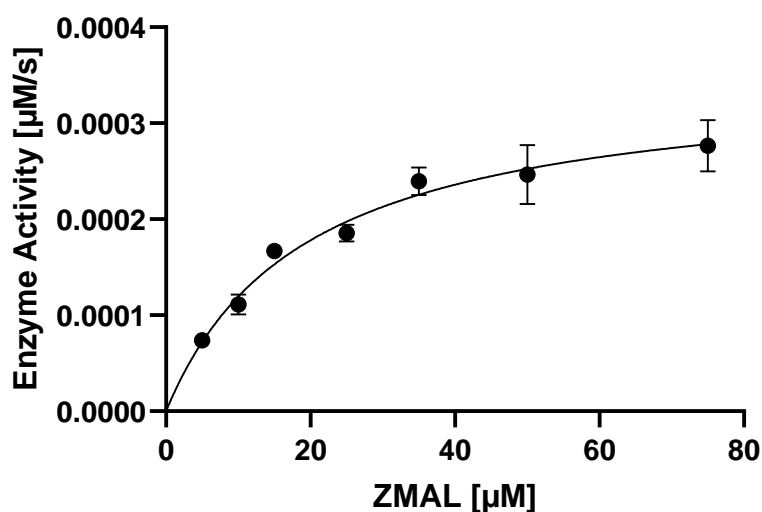

**Figure S2.** Michaelis-Menten constant  $K_M$  determination for HDAC6 using a series of substrate concentrations. Steady-state velocities [ $\mu\text{M}\cdot\text{s}^{-1}$ ] (mean  $\pm$  SD) were plotted against the corresponding substrate concentrations [ $\mu\text{M}$ ] and fitted to the Michaelis-Menten equation yielding the Michaelis-Menten constant:  $K_M$  HDAC6 = 19.27  $\mu\text{M}$ . Experiment was performed in triplicates.

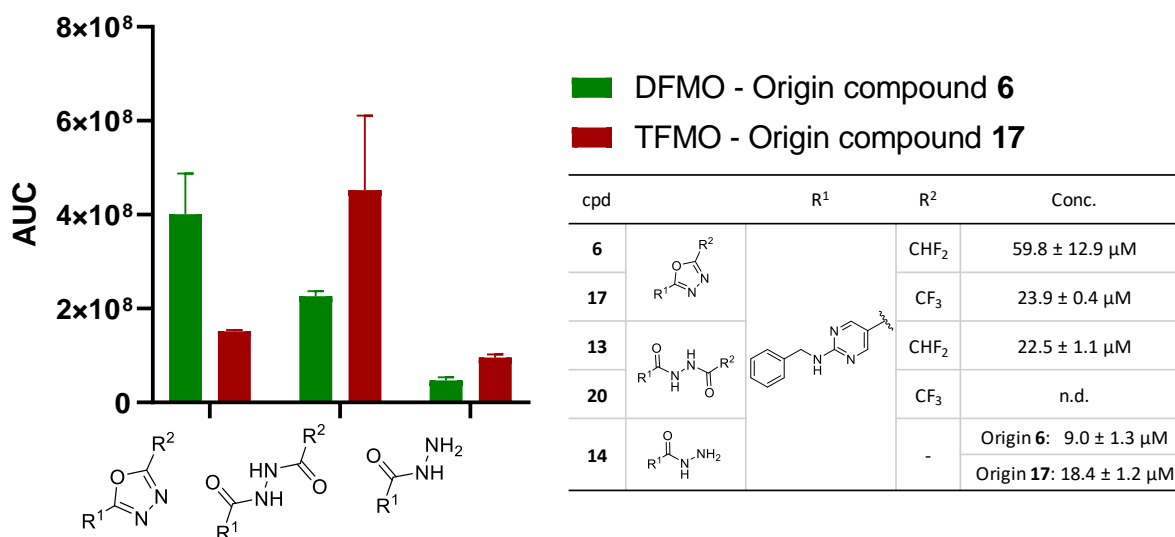

**Figure S3.** Quantified hydrolysis products from LC-UV-MS analysis after over night incubation of the respective compound (100  $\mu\text{M}$ ) with HDAC6. Experiments were performed in triplicates. DFMO: difluoromethyl-1,3,4-oxadiazole; TFMO: trifluoromethyl-1,3,4-oxadiazole. n.d.: not determined.

**A**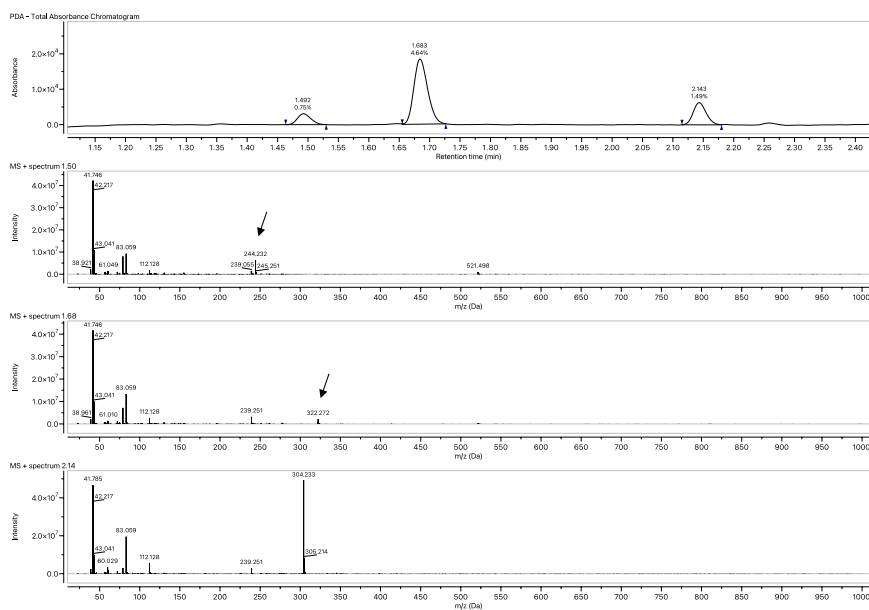**B**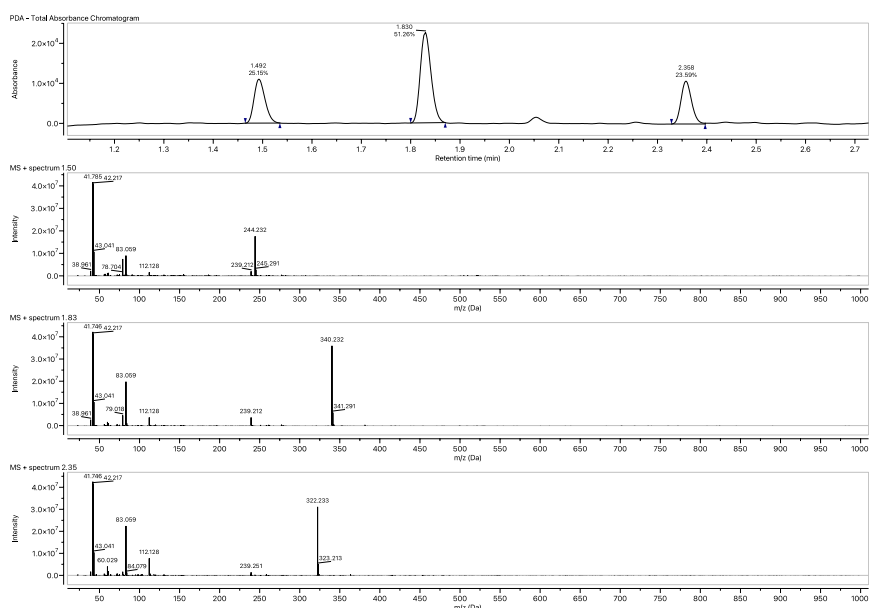

**Figure S4.** Representative UV and related mass traces from two independent LC-UV-MS experiments. **A:** Compound **6** was incubated with HDAC6 overnight; **B:** Compound **17** was incubated with HDAC6 overnight; x axis: retention time in mins (chromatogram), m/z ration (mass spectras), y axis: intensity in Absorbance Units (AU). Experiments were performed in triplicates.

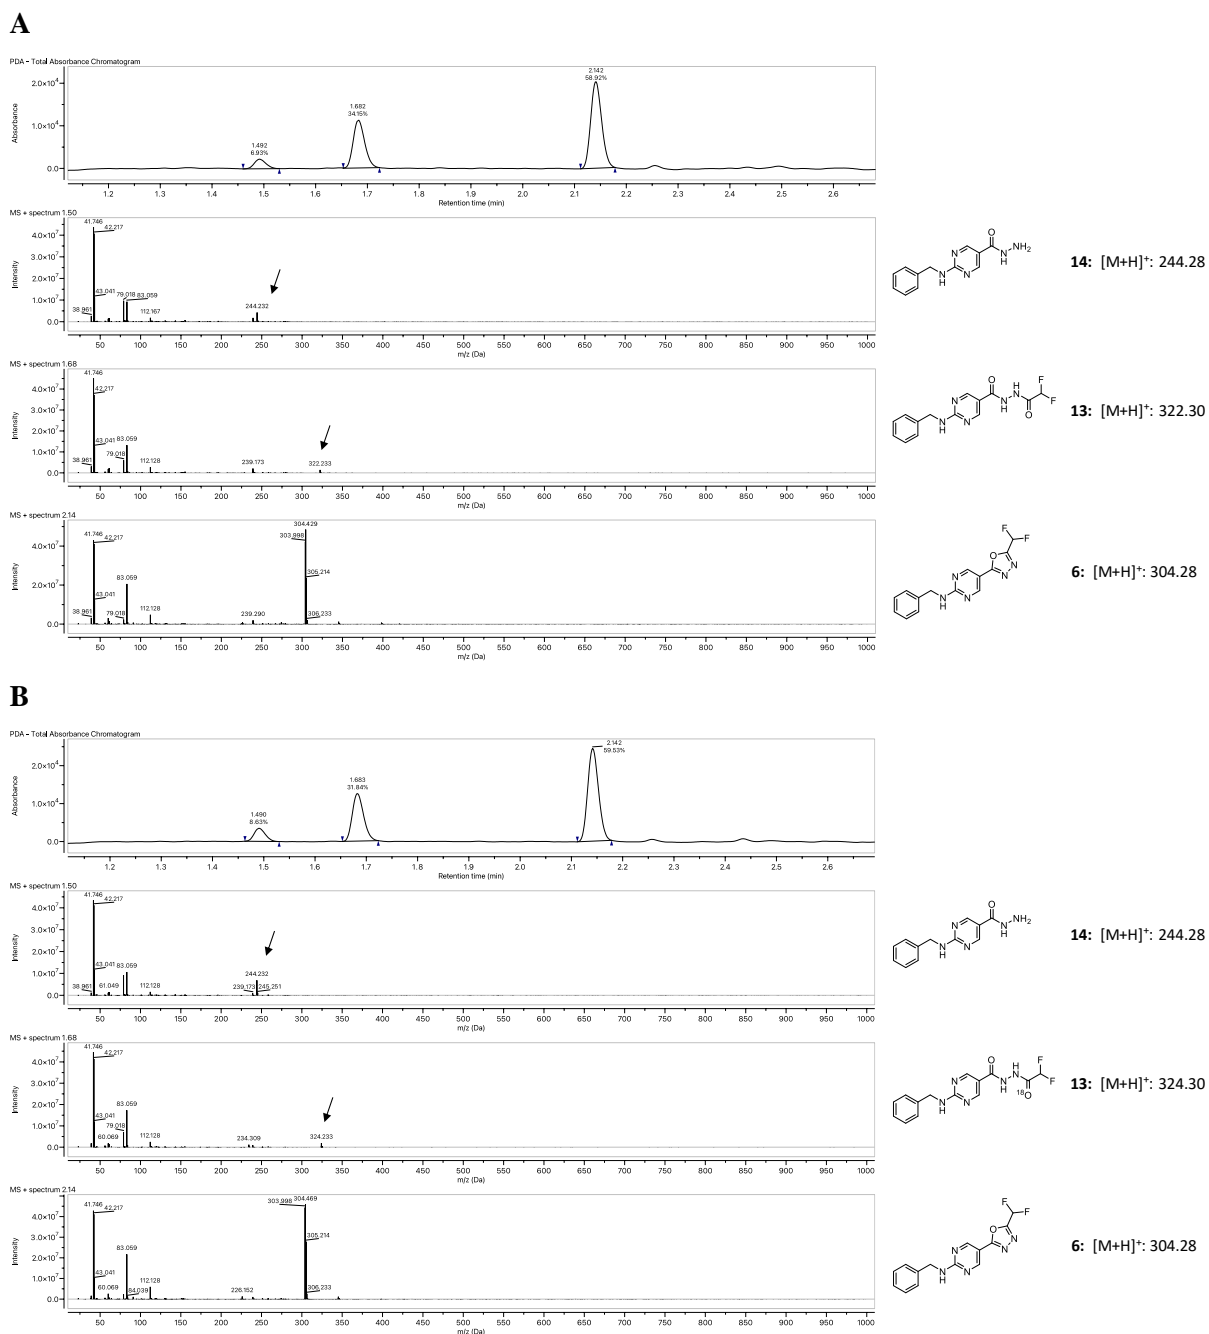

**Figure S5.** Representative UV and related mass traces of LC-UV-MS experiments. **A:** Compound **6** was incubated with HDAC6 overnight in  $H_2^{16}O$  water; **B:** Compound **6** incubated with HDAC6 overnight in  $H_2^{18}O$  water; x axis: retention time in mins (chromatogram), m/z ratio (mass spectras), y axis: intensity in Absorbance Units (AU). Experiments were performed in triplicates.

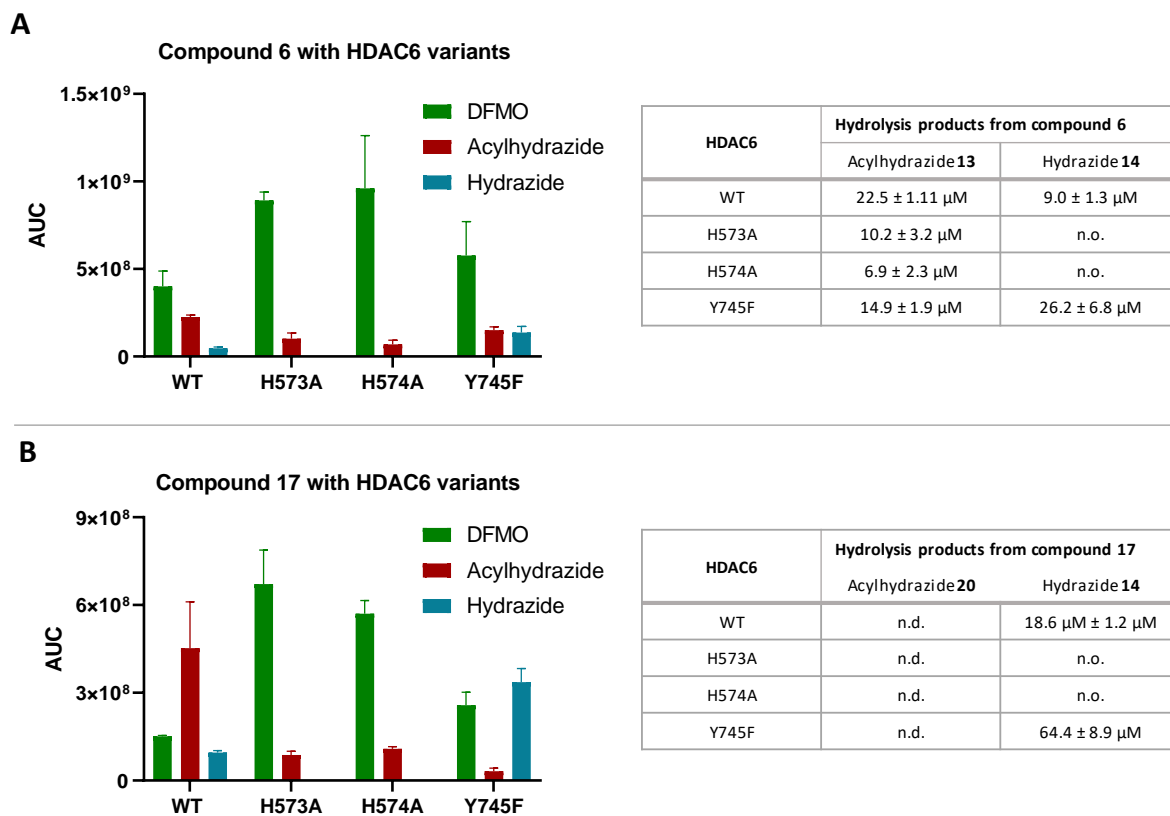

**Figure S6.** Quantified hydrolysis products from LC-UV-MS analysis after over night incubation of the respective compound (100 μM) with various HDAC6 mutants (wild-type (WT), H573A, H574A, Y745F). Experiments were performed in triplicates. n.d.: not determined; n.o.: not observed.

$$[P] = v_{ss}t + \frac{v_{in}-v_{ss}}{k_{obs}}(1 - e^{-k_{obs}t}) \quad (\text{Eq. 1})$$

**Equation 1.** Time-dependent product formation for inhibitors showing slow-binding Mechanism I&II. [P]: amount of generated AMC;  $v_{ss}$ : steady-state velocity (product formation); t: time;  $v_{in}$ : initial velocity (product formation);  $k_{obs}$ : apparent first-order rate constant for the conversion from  $v_{in}$  to  $v_{ss}$ .

$$k_{obs} = k_{-1} + k_1 \left(1 + \frac{[S]}{K_M}\right) [I] \quad (\text{Eq. 2})$$

**Equation 2.** The single-step slow-binding Mechanism I results in a linear relationship between  $k_{obs}$  and inhibitor concentration.  $k_{-1}$ : dissociation rate constant;  $k_1$ : association rate constant; [S]: substrate concentration;  $K_M$ : Michelis-Menten constant; [I]: inhibitor concentration.

$$k_{obs} = k_{-2} + \frac{k_2}{[I] + K_{i,1} \left(1 + \frac{[S]}{K_M}\right)} [I] \quad (\text{Eq. 3})$$

**Equation 3.** The two-step slow-binding Mechanism II results in a hyperbolic relationship between  $k_{obs}$  and inhibitor concentration.  $k_{-2}$ : secondary dissociation rate constant;  $k_2$ : secondary association rate constant;  $K_{i,1}$ : equilibrium dissociation constant of the enzyme inhibitor encounter complex [EI].



**Table S1:** Data collection and refinement statistics<sup>a</sup>

| HDAC6 CD2–13 Complex                              |                                                       |
|---------------------------------------------------|-------------------------------------------------------|
| Space group                                       | <i>P</i> 2 <sub>1</sub> 2 <sub>1</sub> 2 <sub>1</sub> |
| a,b,c (Å)                                         | 74.60, 92.30, 96.60                                   |
| α, β, γ (°)                                       | 90.00, 90.00, 90.00                                   |
| R <sub>merge</sub> <sup>b</sup>                   | 0.210 (0.706)                                         |
| R <sub>pim</sub> <sup>c</sup>                     | 0.084(0.289)                                          |
| CC <sub>1/2</sub> <sup>d</sup>                    | 0.993(0.851)                                          |
| Redundancy                                        | 1.9                                                   |
| Completeness (%)                                  | 99.5(94.3)                                            |
| I/σ                                               | 7.3(2.5)                                              |
| Refinement                                        |                                                       |
| Resolution (Å)                                    | 36.216–2.00 (2.07–2.00)                               |
| No. reflections                                   | 90179 (8857)                                          |
| R <sub>work</sub> /R <sub>free</sub> <sup>e</sup> | 0.185/0.223<br>(0.228/0.0.266)                        |
| Number of Atoms <sup>f</sup>                      |                                                       |
| Protein                                           | 5469                                                  |
| Ligand                                            | 52                                                    |
| Solvent                                           | 424                                                   |
| Average B factors (Å <sup>2</sup> )               |                                                       |
| Protein                                           | 15                                                    |
| Ligand                                            | 20                                                    |
| Solvent                                           | 20                                                    |
| RMS Deviations                                    |                                                       |
| Bond lengths (Å)                                  | 0.03                                                  |
| Bond angles (°)                                   | 1.4                                                   |
| Ramachandran Plot <sup>g</sup>                    |                                                       |
| Favored                                           | 97.01                                                 |
| Allowed                                           | 2.99                                                  |
| Outliers                                          | 0.00                                                  |

<sup>a</sup>Values in parentheses refer to the highest-resolution shell of data.

<sup>b</sup> $R_{\text{merge}} = \sum_h \sum_i |I_{i,h} - \langle I \rangle_h| / \sum_h \sum_i I_{i,h}$ , where  $\langle I \rangle_h$  is the average intensity calculated for reflection  $h$  from  $i$  replicate measurements.

<sup>c</sup> $R_{\text{p.i.m.}} = (\sum_h (1/(N-1))^{1/2} \sum_i |I_{i,h} - \langle I \rangle_h|) / \sum_h \sum_i I_{i,h}$ , where  $N$  is the number of reflections and  $\langle I \rangle_h$  is the average intensity calculated for reflection  $h$  from replicate measurements.

<sup>d</sup>Pearson correlation coefficient between random half-datasets.

<sup>e</sup> $R_{\text{work}} = \sum ||F_o| - |F_c|| / \sum |F_o|$  for reflections contained in the working set.  $|F_o|$  and  $|F_c|$  are the observed and calculated structure factor amplitudes, respectively.  $R_{\text{free}}$  is calculated using the same expression for reflections contained in the test set held aside during refinement.

<sup>f</sup>Per asymmetric unit.

<sup>g</sup>Calculated with MolProbity.



**$^{19}\text{F}$  NMR spectrum of **1** (377 MHz,  $\text{CDCl}_3$ )**

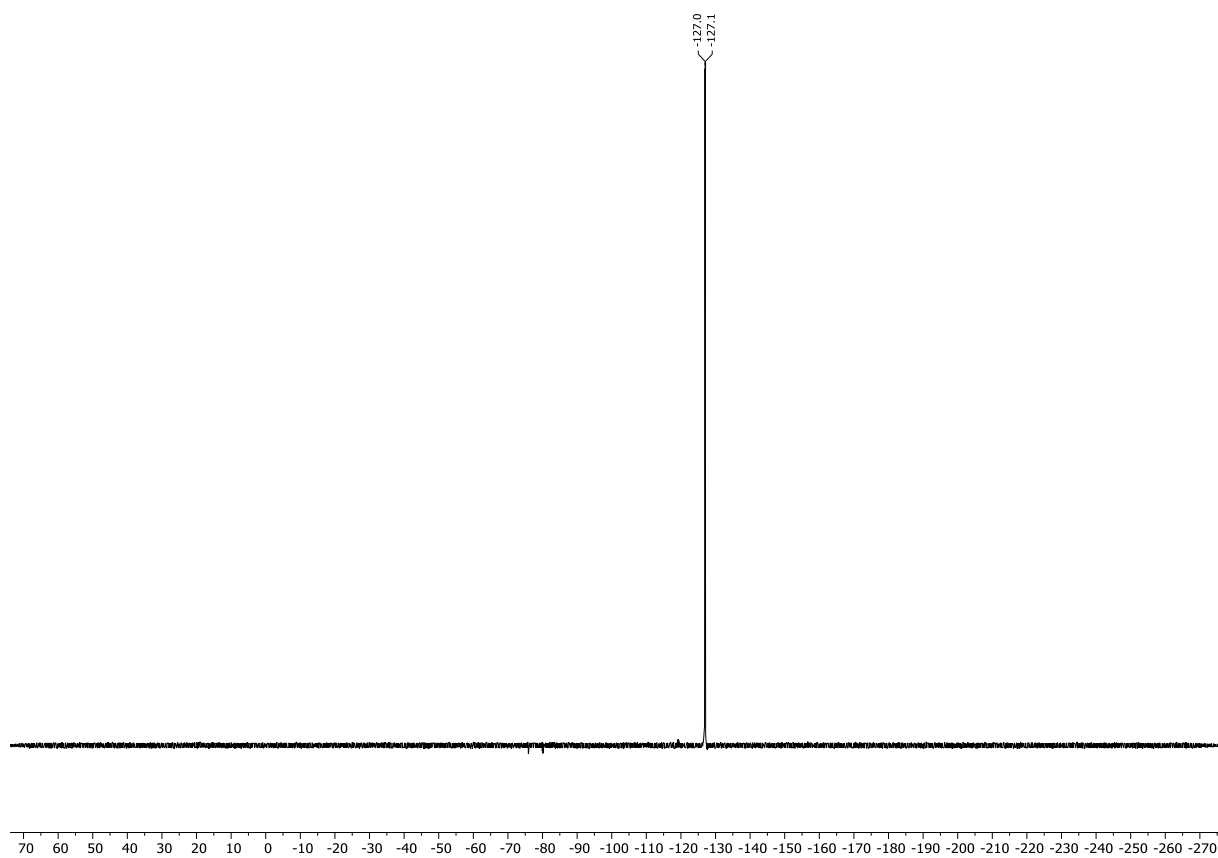

**<sup>1</sup>H NMR spectrum of 2 (600 MHz, DMSO-*d*<sub>6</sub>)**

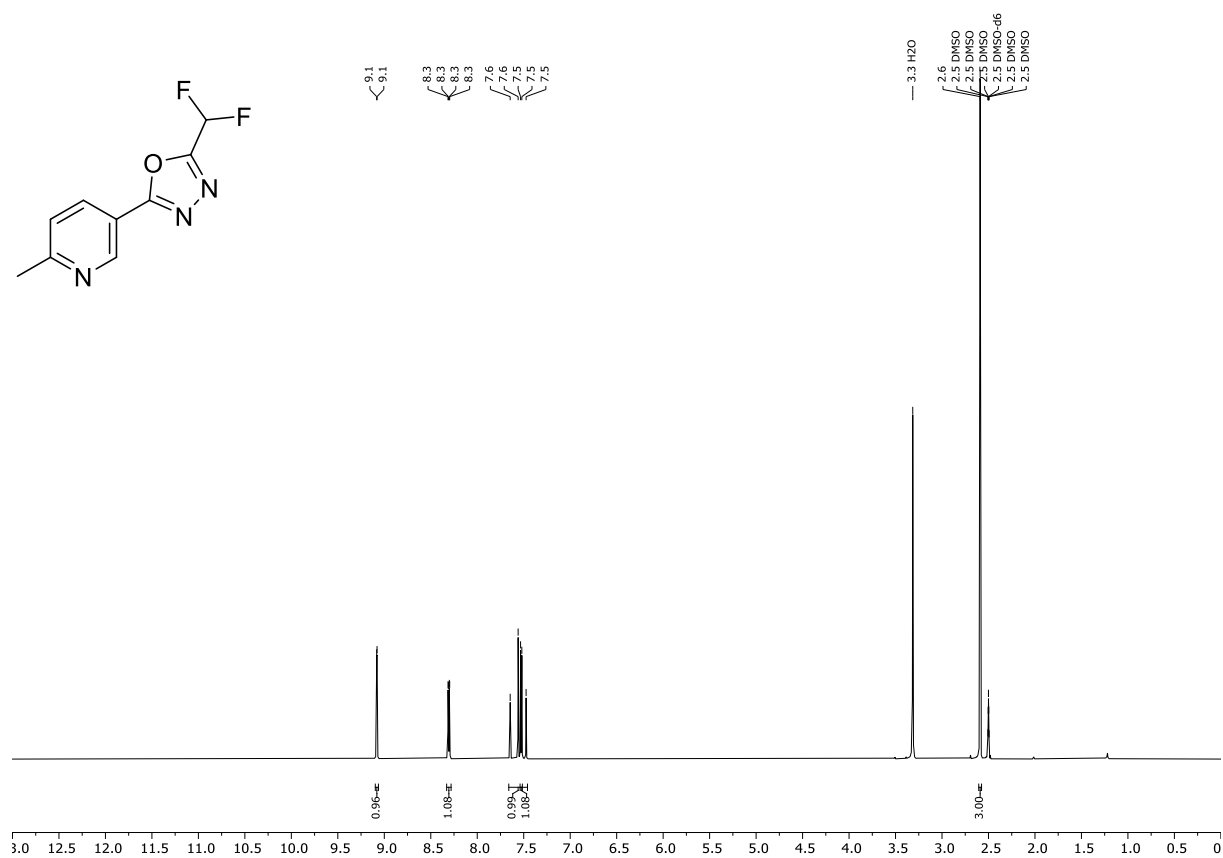

**<sup>13</sup>C NMR spectrum of 2 (151 MHz, DMSO-*d*<sub>6</sub>)**

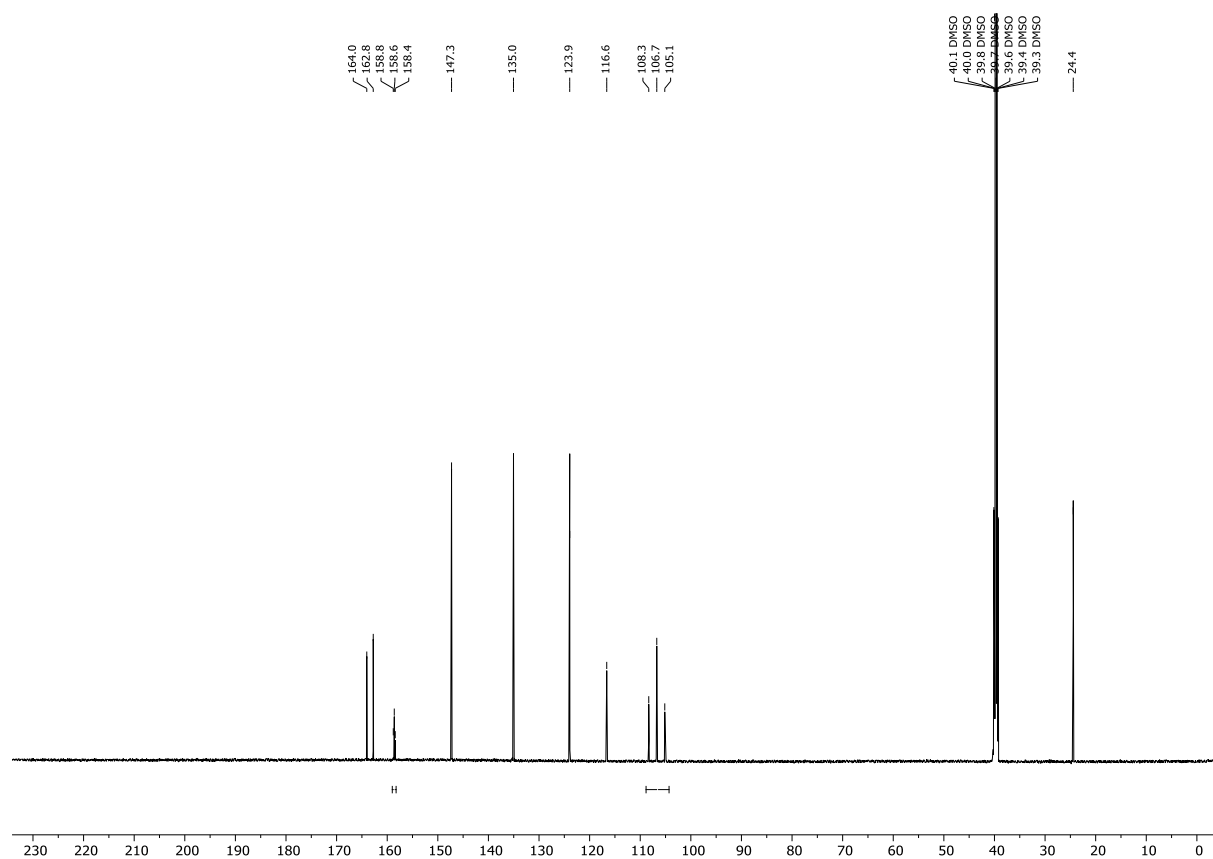

$^{19}\text{F}$  NMR spectrum of **2** (565 MHz, DMSO- $d_6$ )

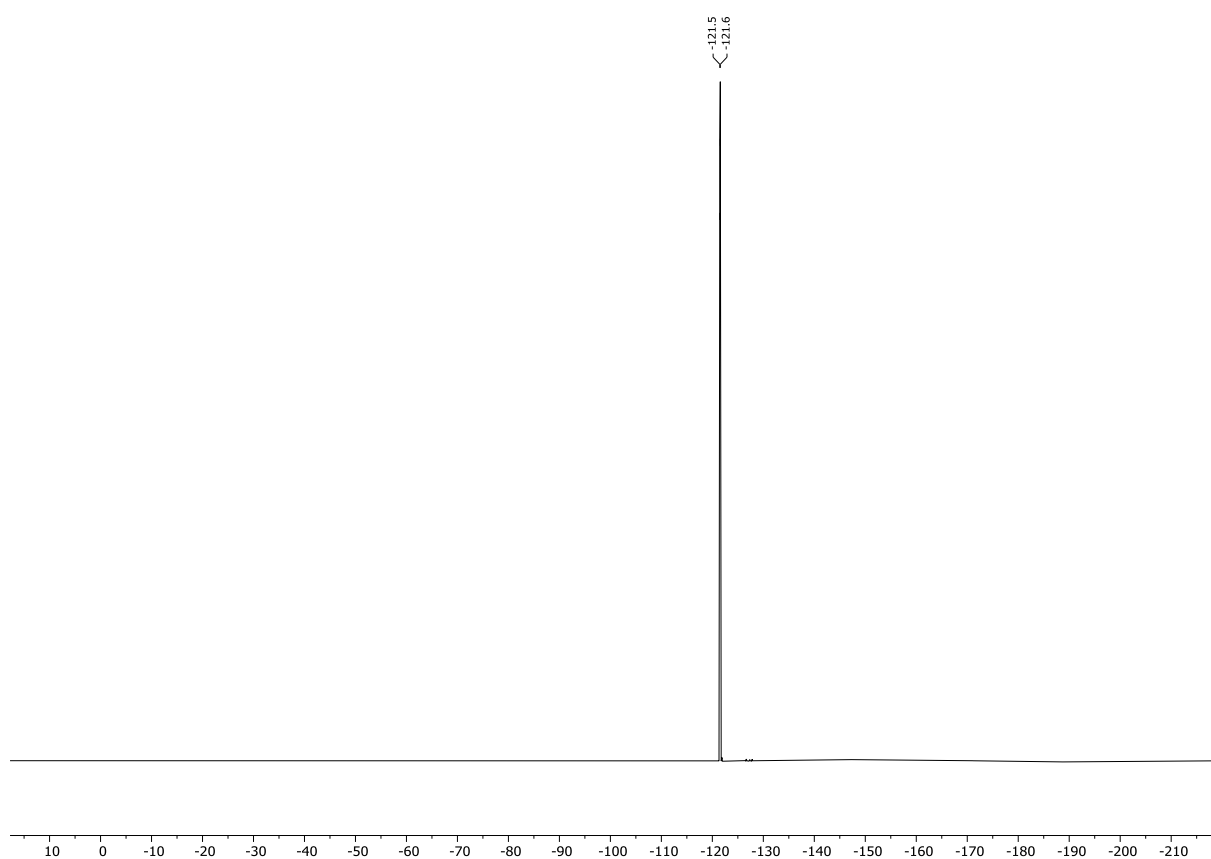



$^{19}\text{F}$  NMR spectrum of **3** (377 MHz,  $\text{CDCl}_3$ )

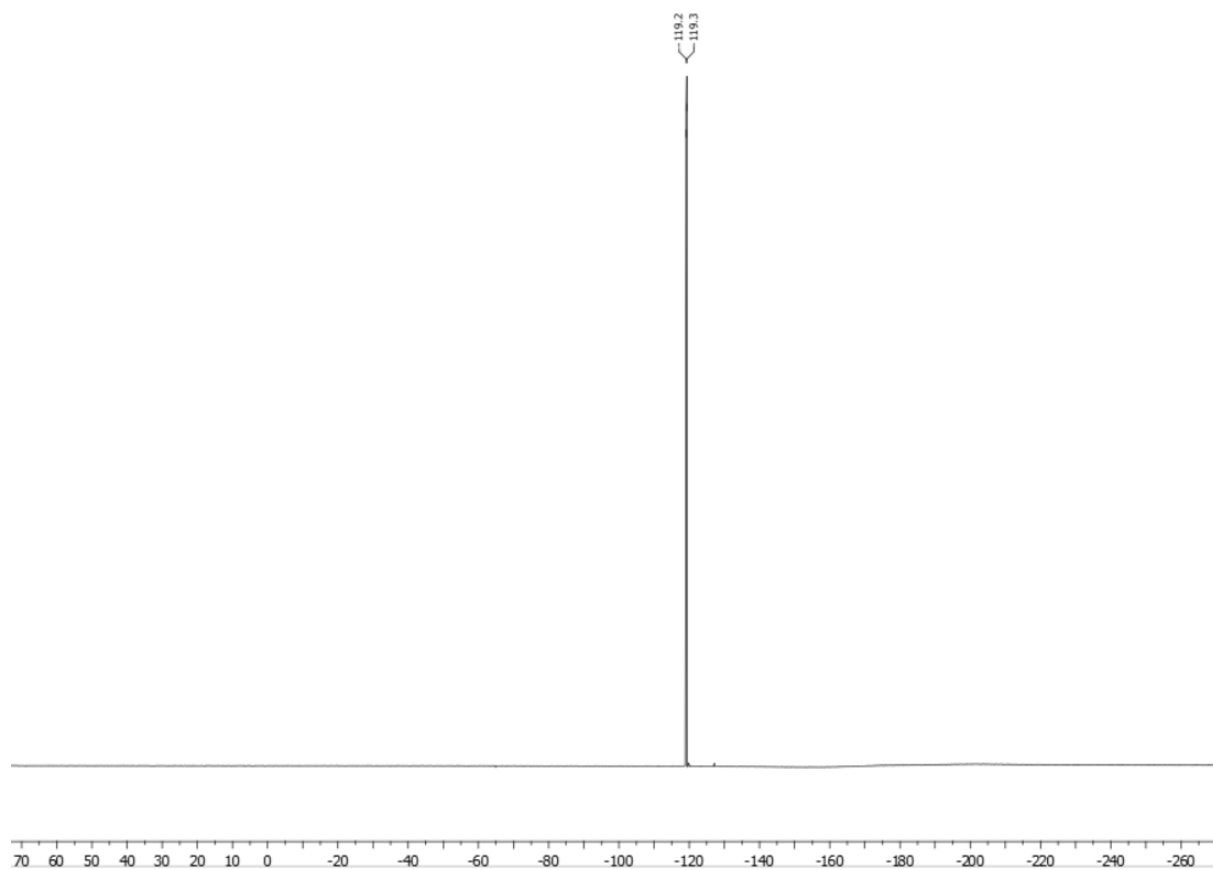





**<sup>1</sup>H NMR spectrum of 5 (600 MHz, CDCl<sub>3</sub>)**

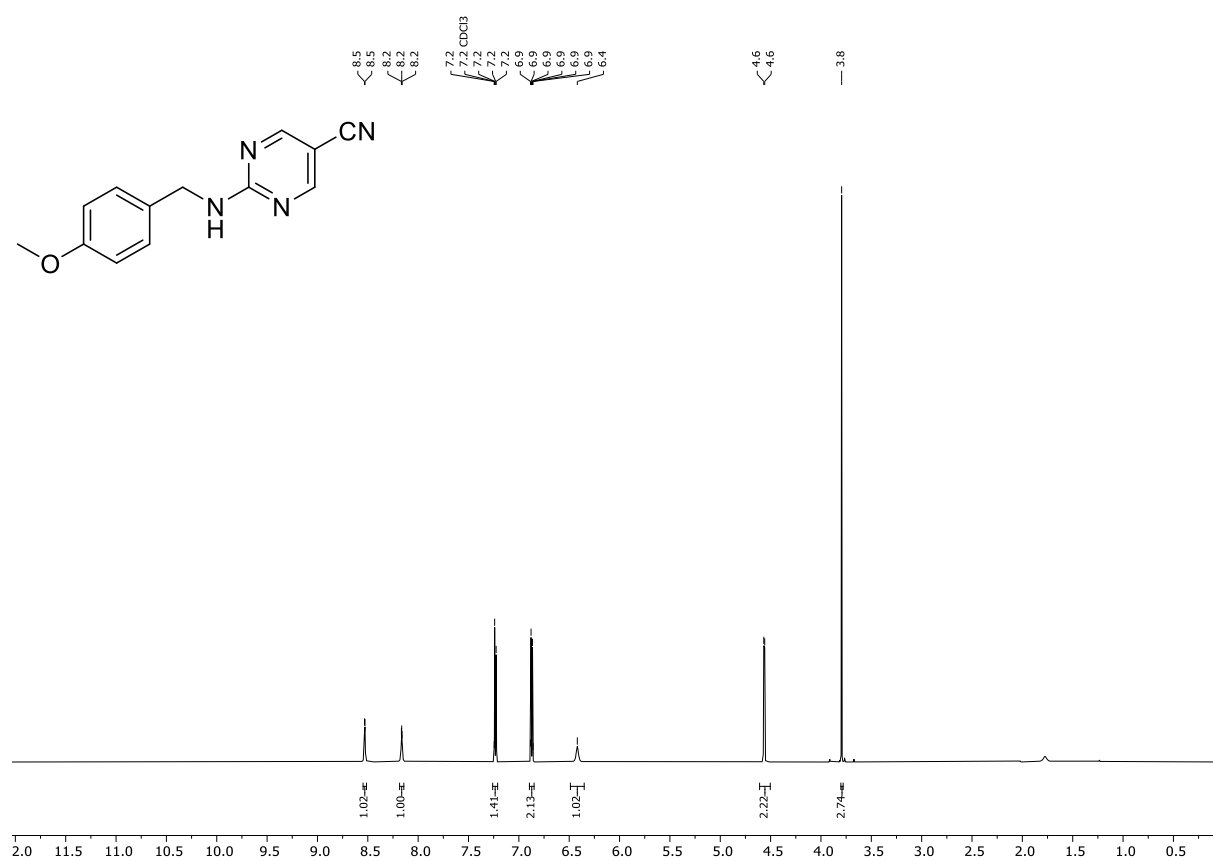

**<sup>13</sup>C NMR spectrum of 5 (151 MHz, CDCl<sub>3</sub>)**

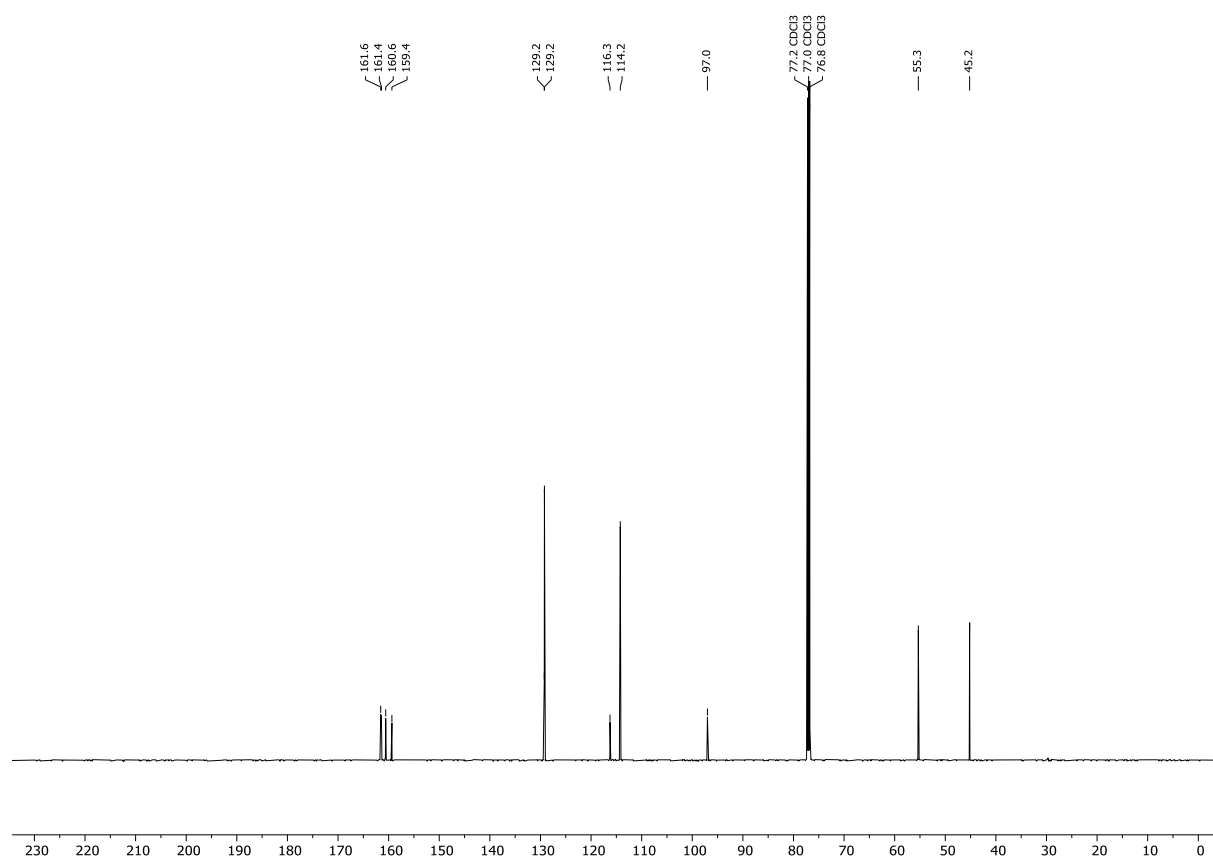

<sup>1</sup>H NMR spectrum of **6** (600 MHz, DMSO-d<sub>6</sub>)

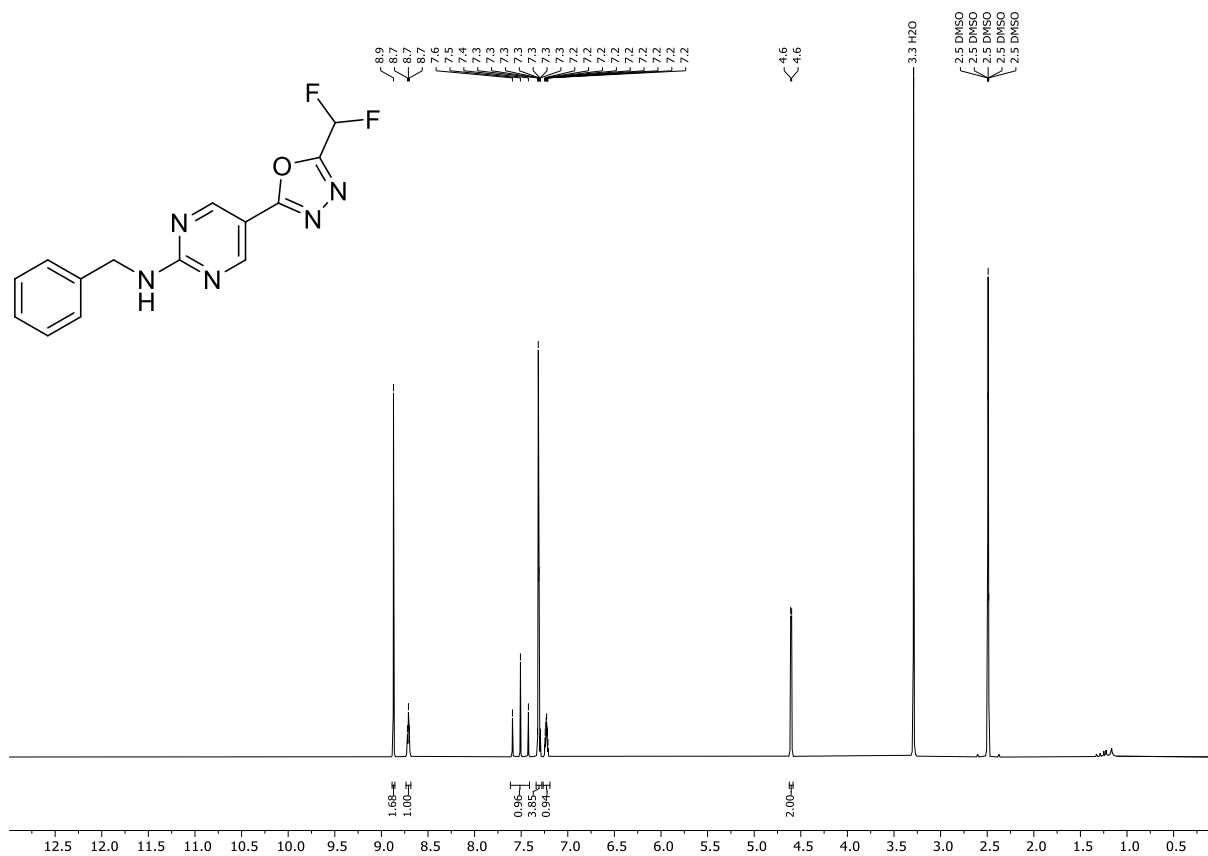

<sup>13</sup>C NMR spectrum of **6** (151 MHz, DMSO-d<sub>6</sub>)

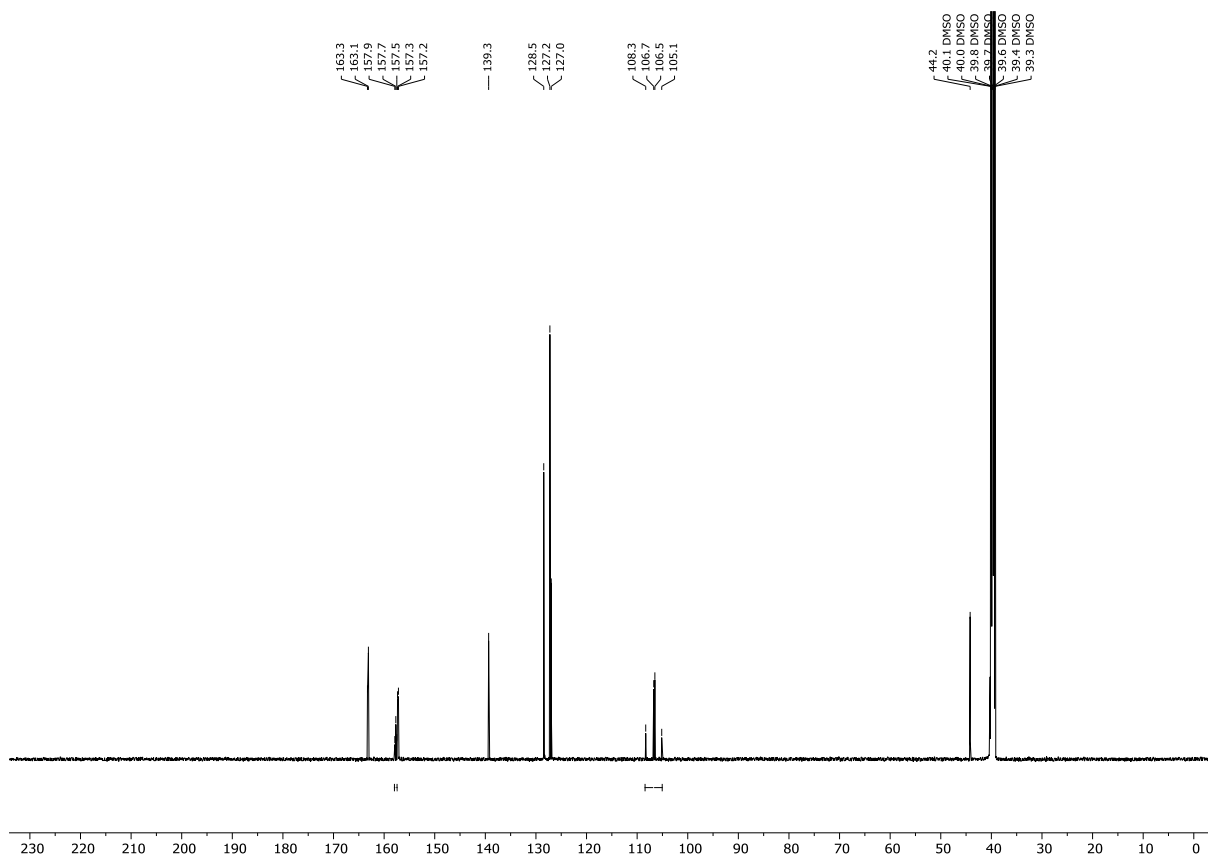

$^{19}\text{F}$  NMR spectrum of **6** (565 MHz,  $\text{DMSO-}d_6$ )

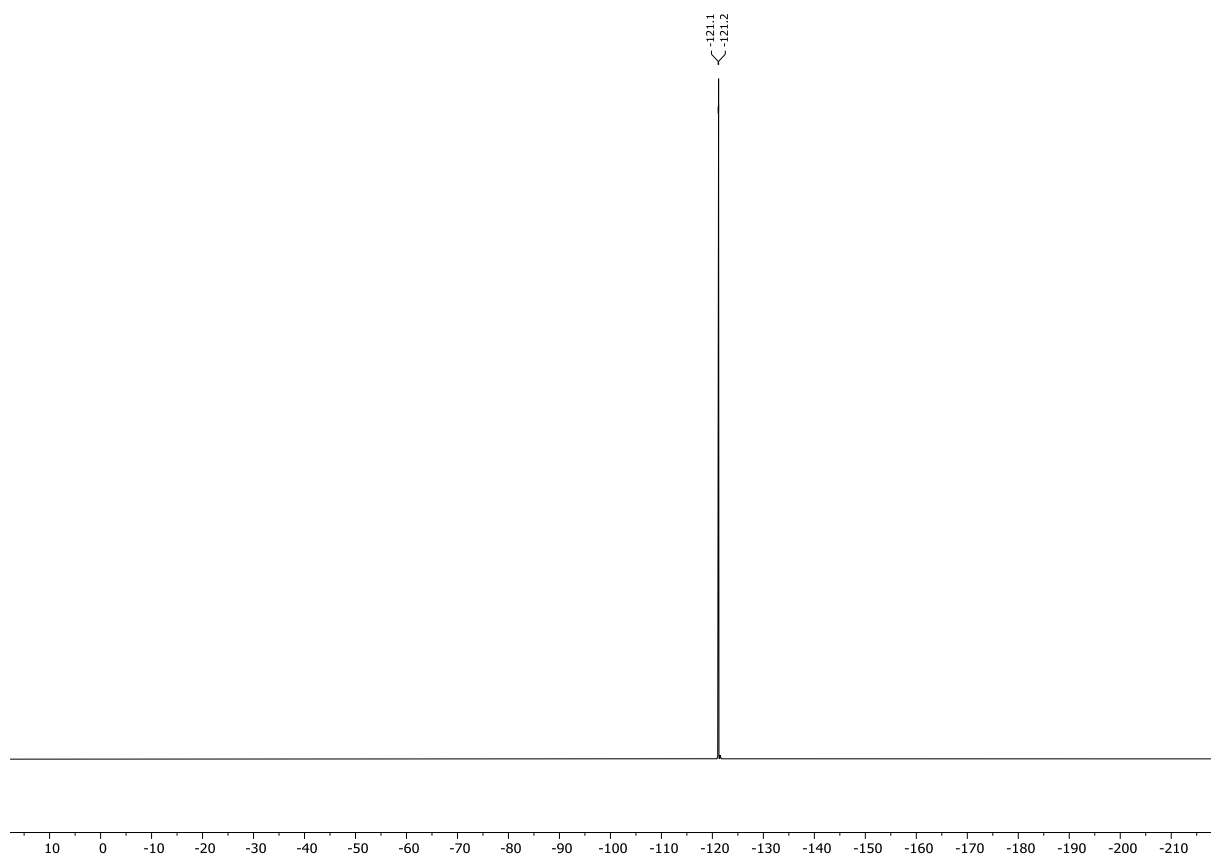

**<sup>1</sup>H NMR spectrum of 7 (600 MHz, DMSO-*d*<sub>6</sub>)**

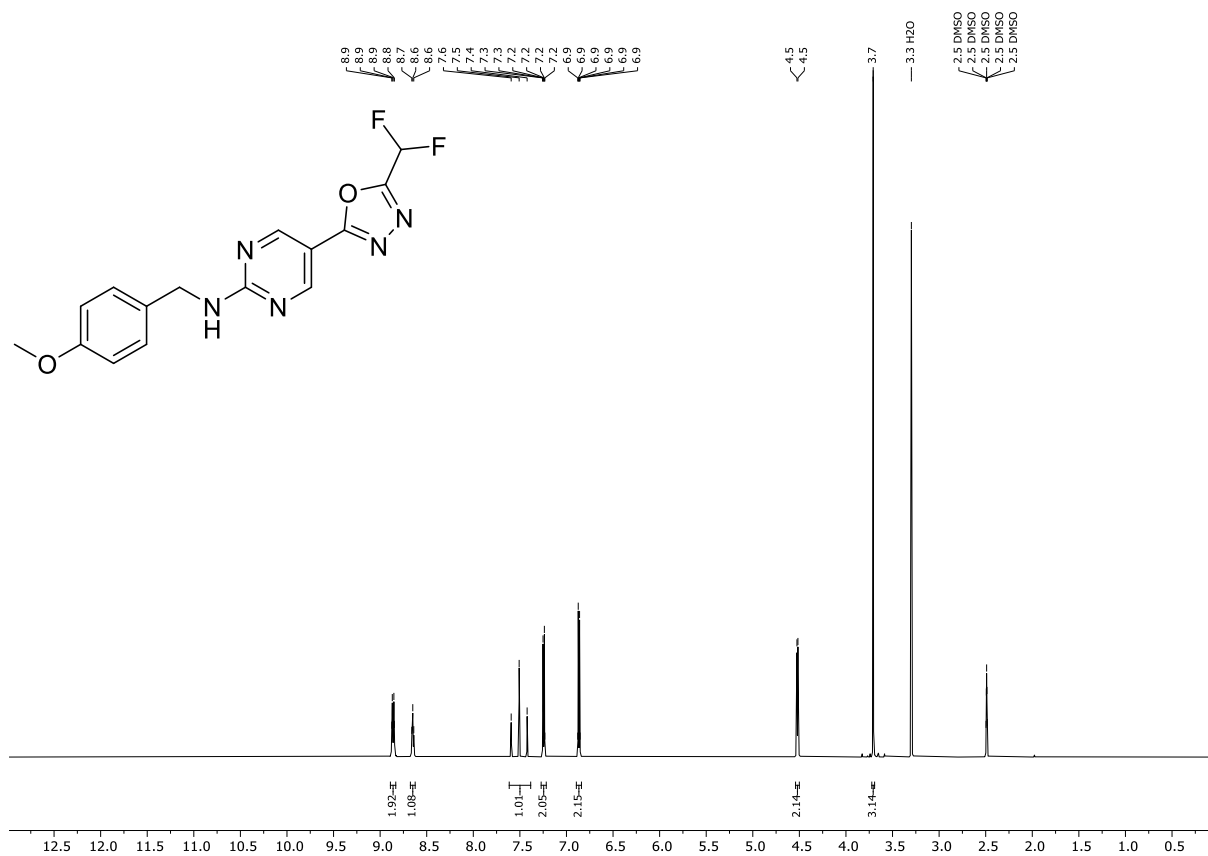

**<sup>13</sup>C NMR spectrum of 7 (151 MHz, DMSO-*d*<sub>6</sub>)**

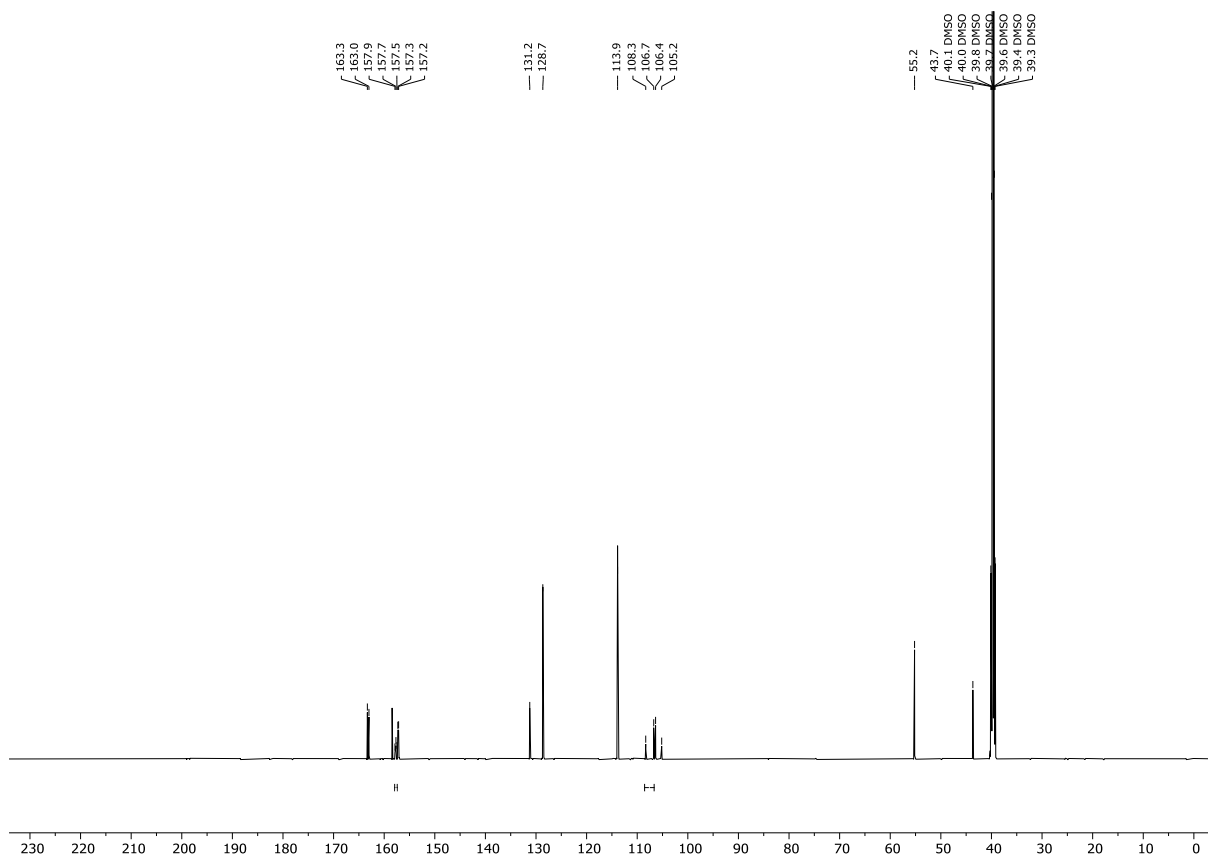

$^{19}\text{F}$  NMR spectrum of **7** (565 MHz,  $\text{DMSO-}d_6$ )

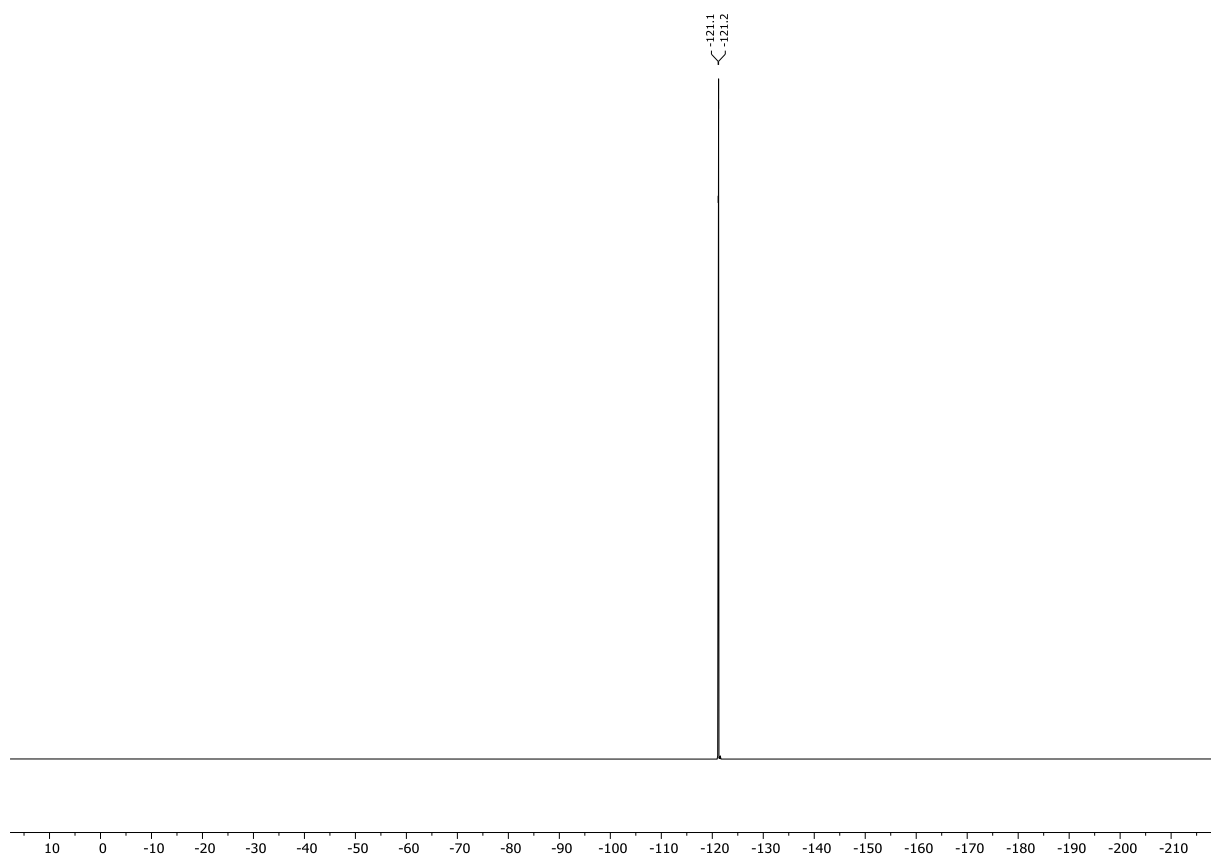

**<sup>1</sup>H NMR spectrum of 8 (600 MHz, DMSO-*d*<sub>6</sub>)**

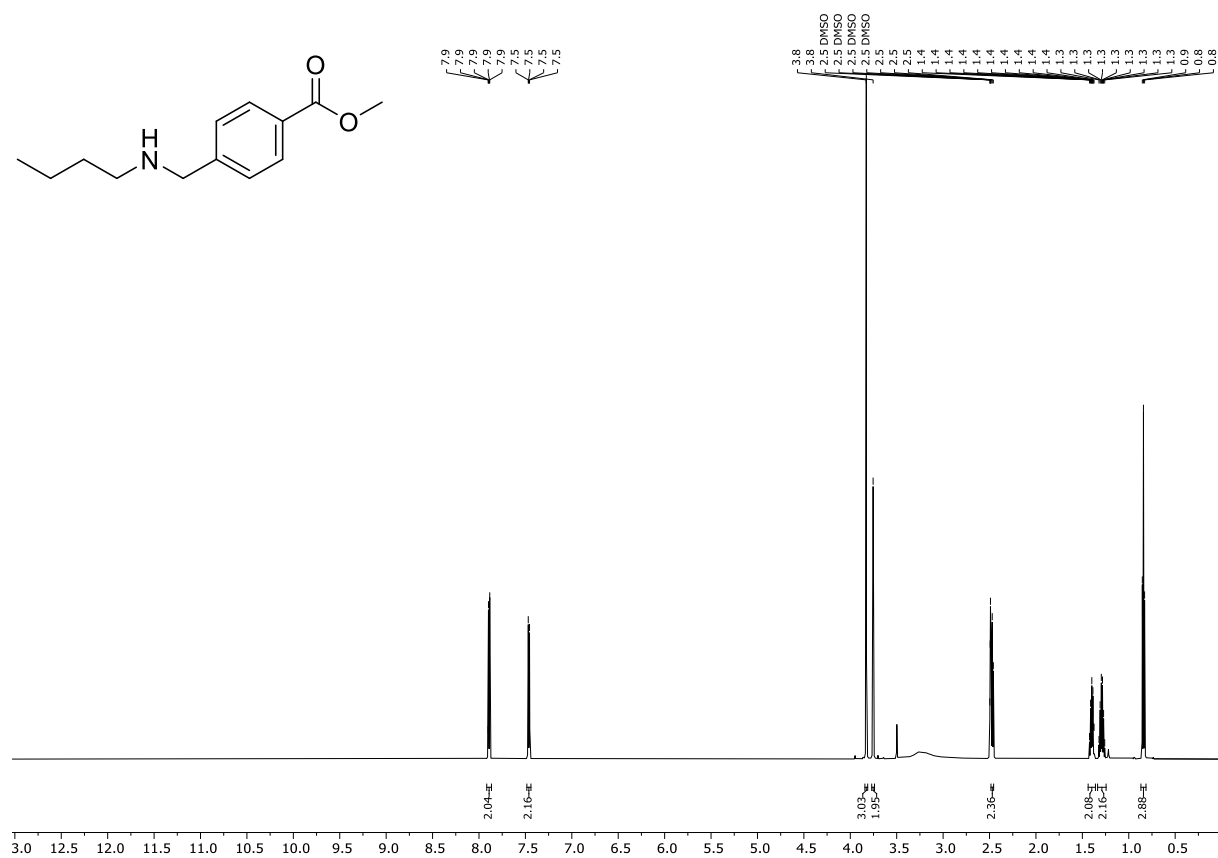

**<sup>13</sup>C NMR spectrum of 8 (151 MHz, DMSO-*d*<sub>6</sub>)**

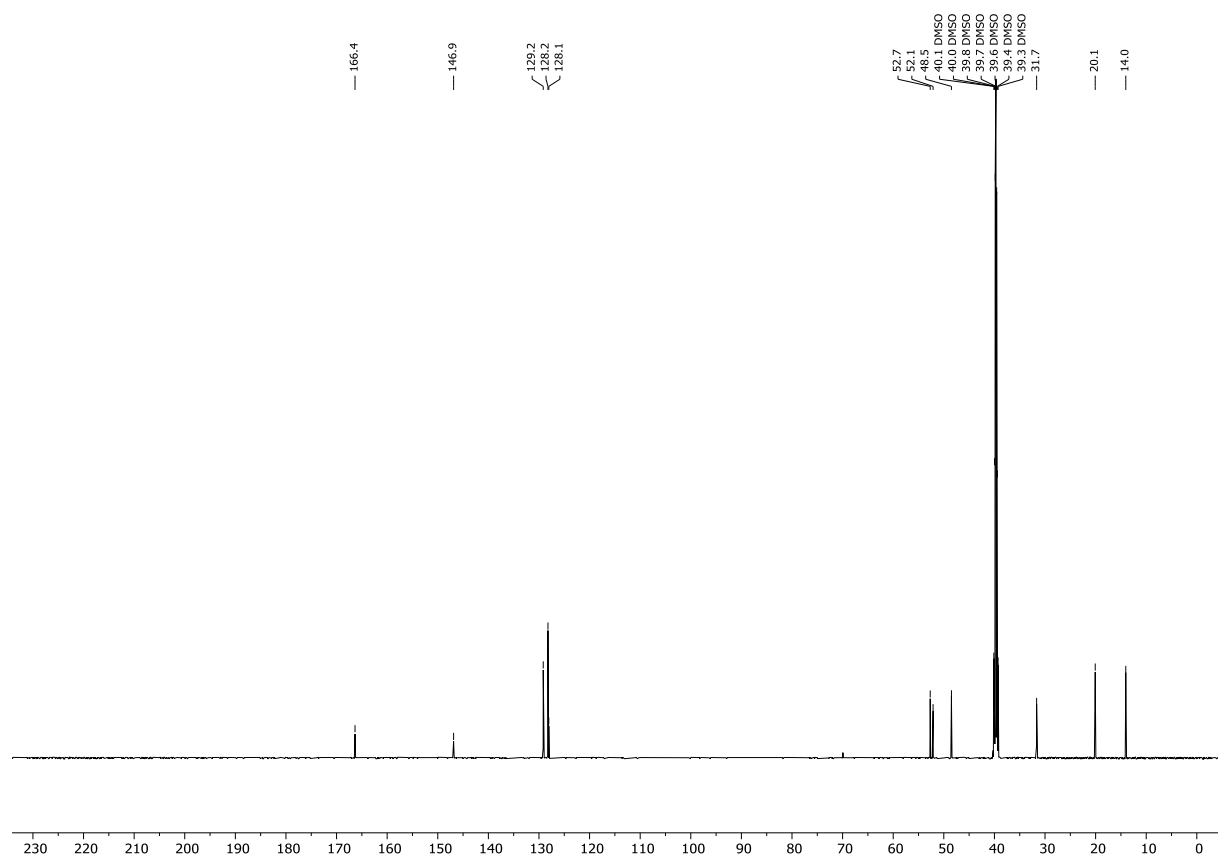

**<sup>1</sup>H NMR spectrum of 9 (600 MHz, DMSO-*d*<sub>6</sub>)**

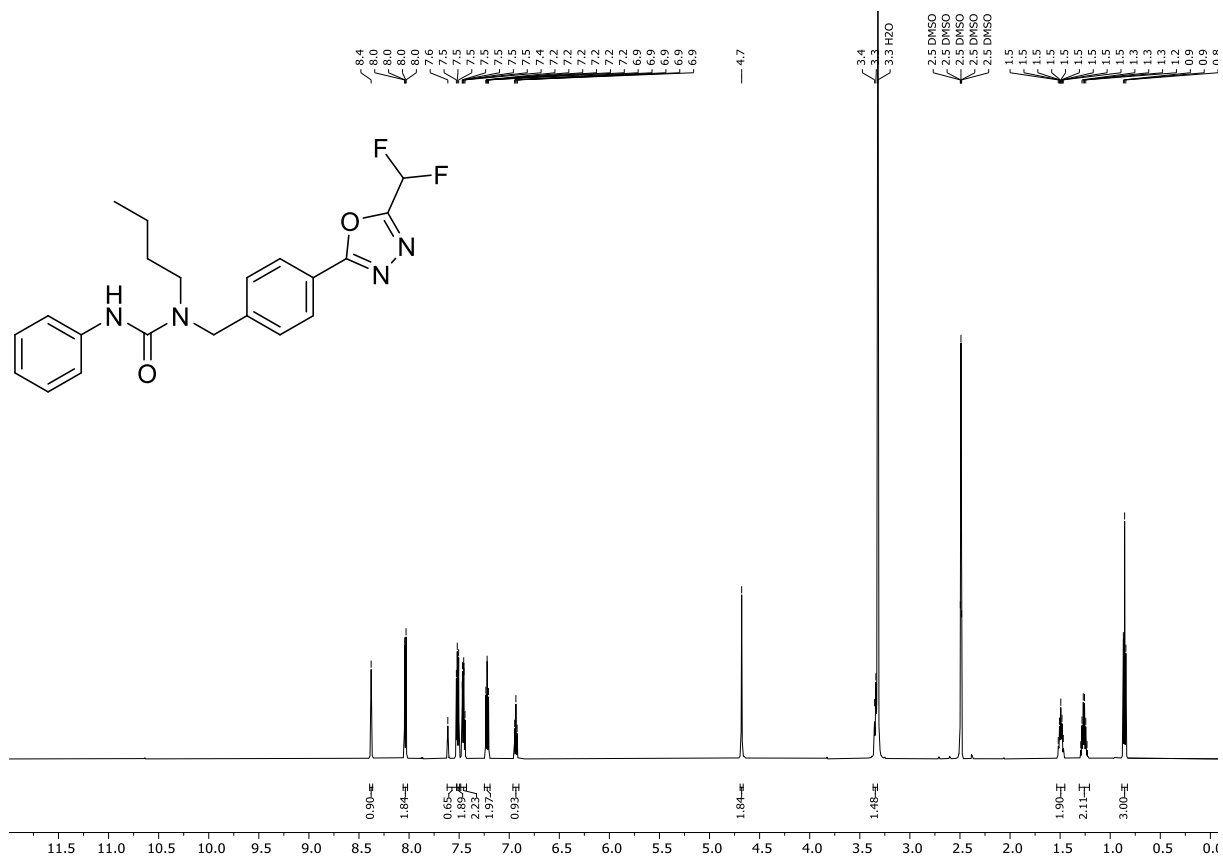

**<sup>13</sup>C NMR spectrum of 9 (151 MHz, DMSO-*d*<sub>6</sub>)**

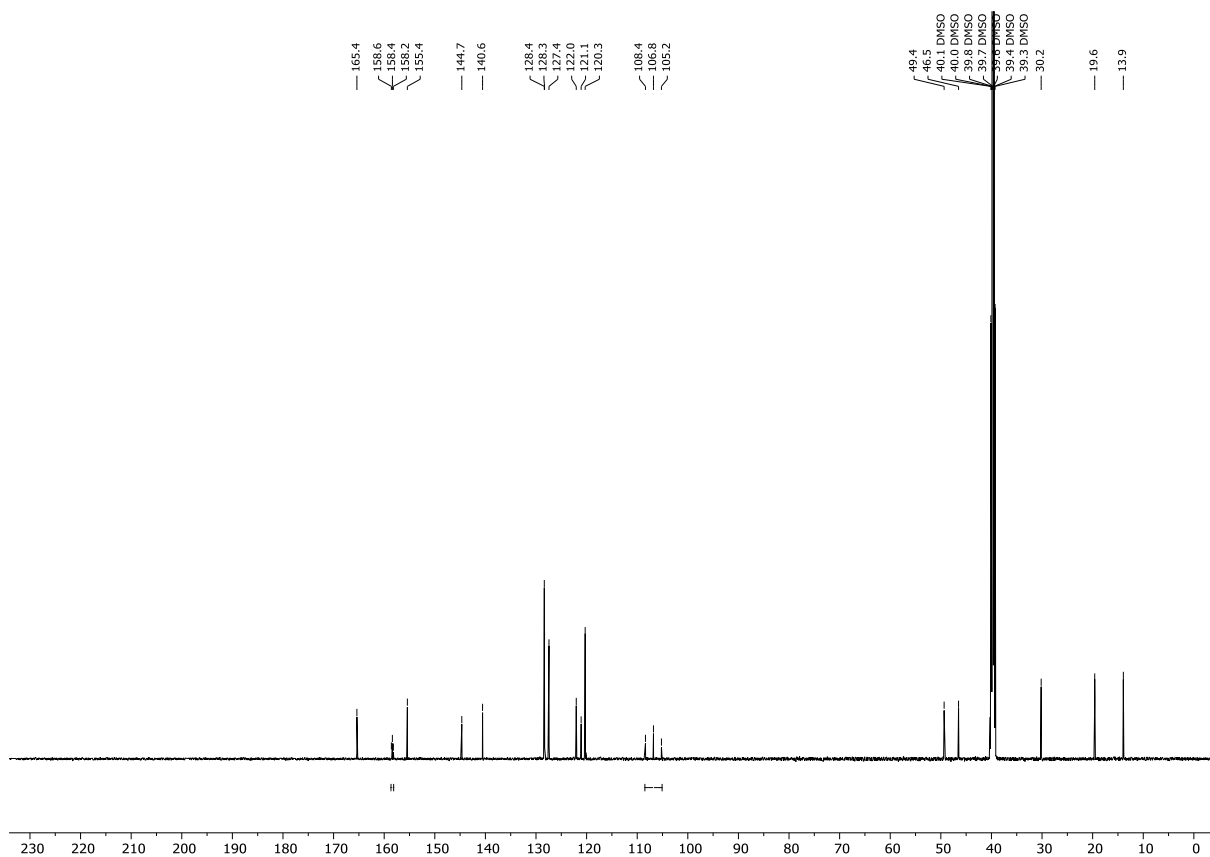

$^{19}\text{F}$  NMR spectrum of **9** (565 MHz, DMSO- $d_6$ )

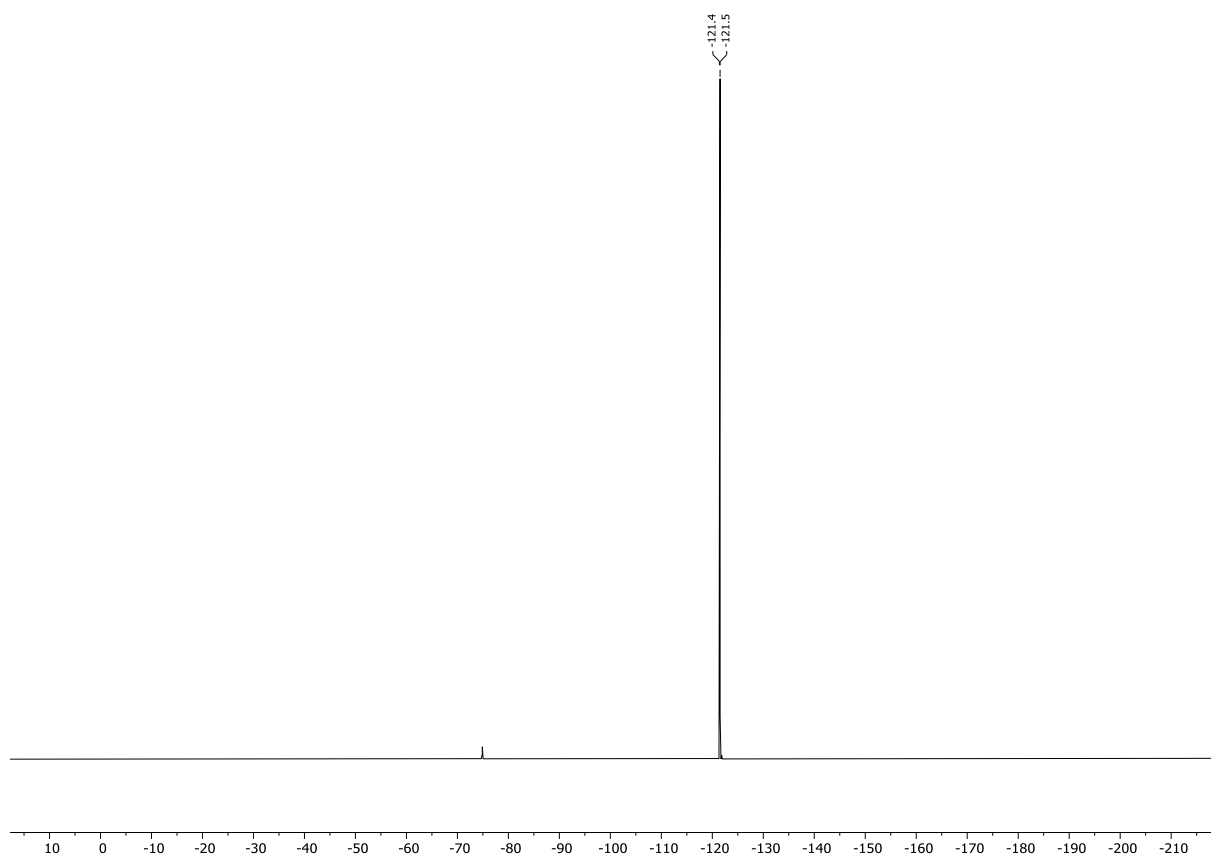



**<sup>1</sup>H NMR spectrum of 10 (600 MHz, CDCl<sub>3</sub>)**

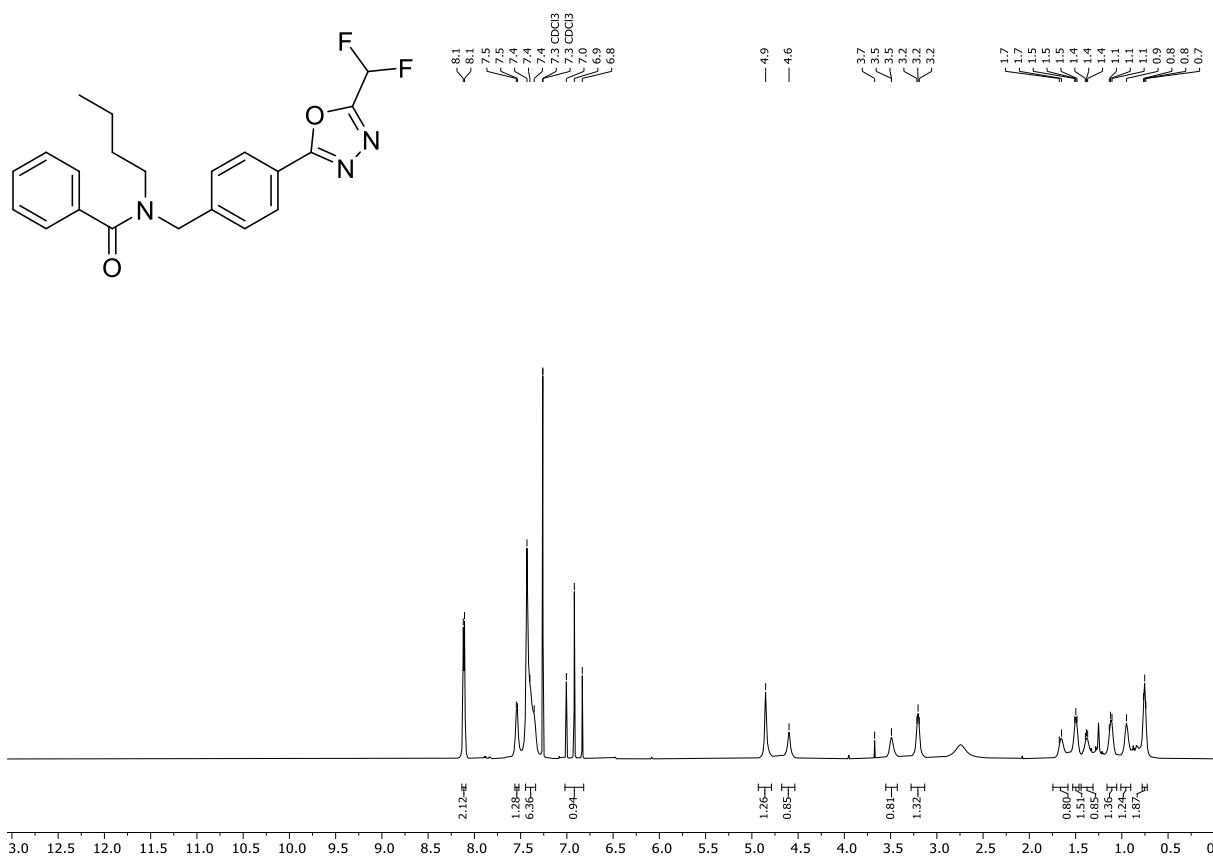

**<sup>13</sup>C NMR spectrum of 10 (151 MHz, CDCl<sub>3</sub>)**

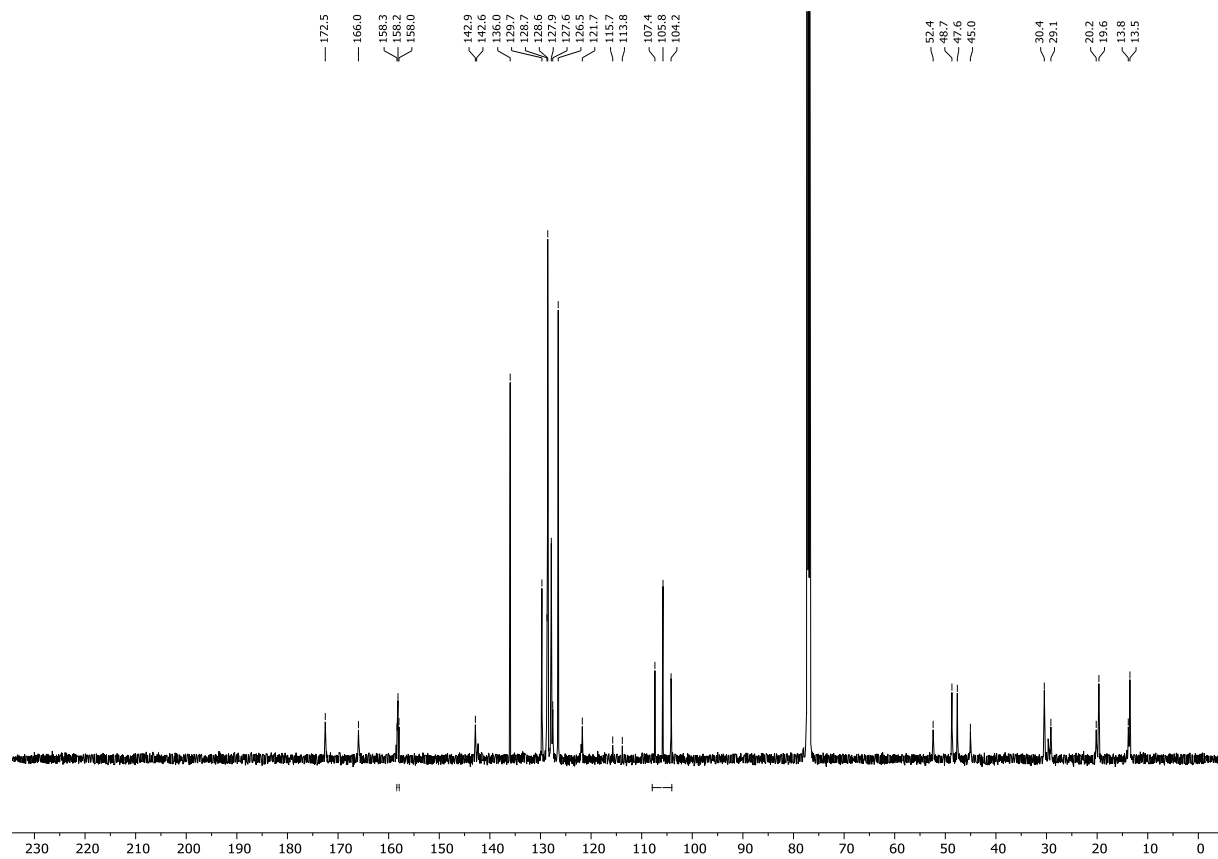

**$^{19}\text{F}$  NMR spectrum of **10** (565 MHz,  $\text{CDCl}_3$ )**

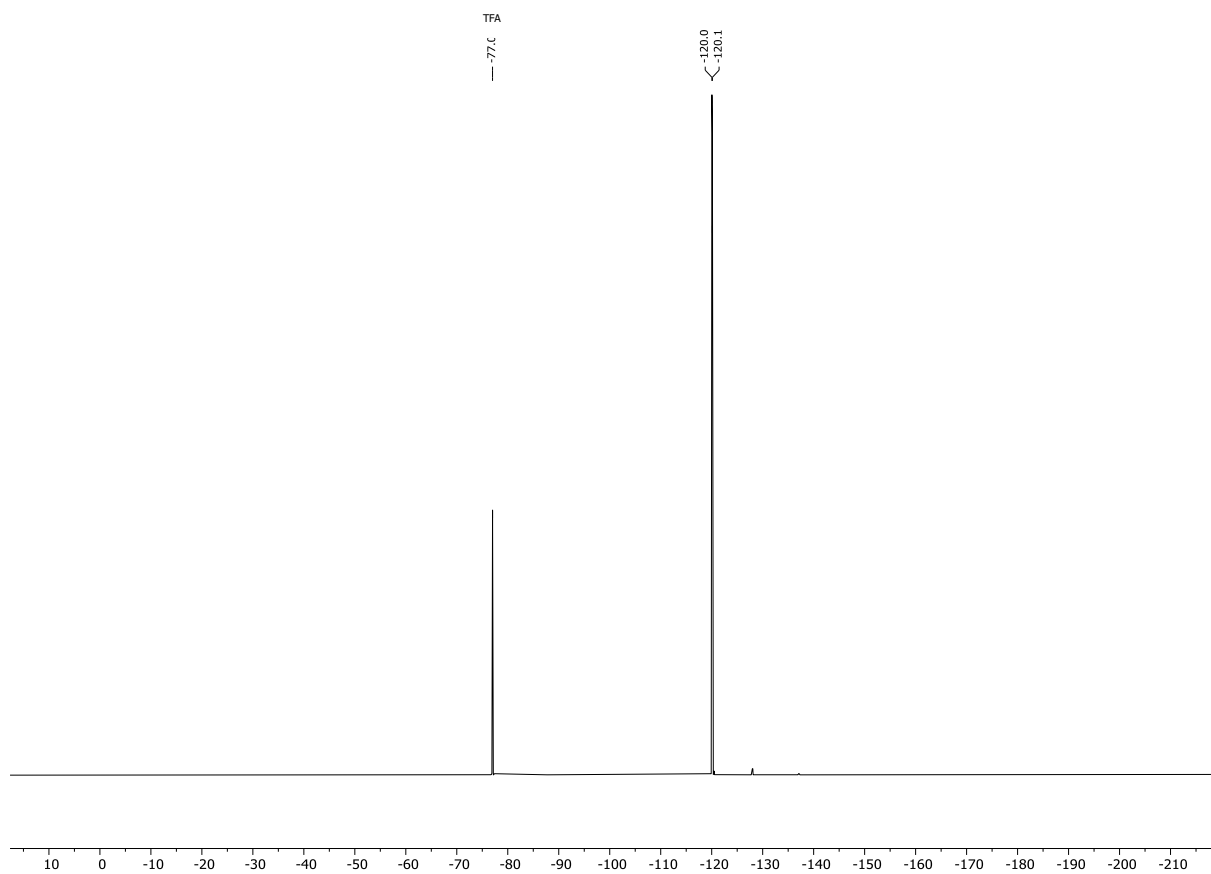

**<sup>1</sup>H NMR spectrum of 12 (600 MHz, DMSO-*d*<sub>6</sub>)**

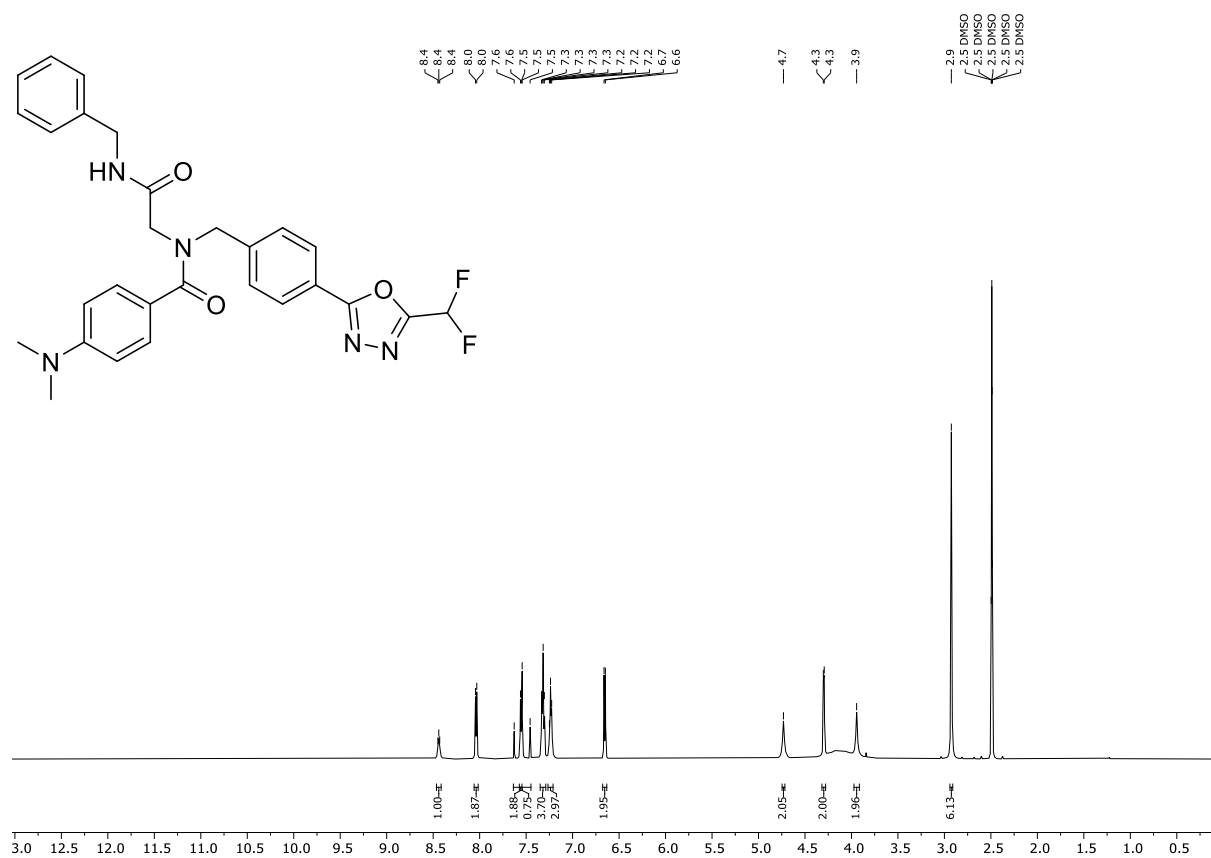

**<sup>13</sup>C NMR spectrum of 12 (151 MHz, DMSO-*d*<sub>6</sub>)**

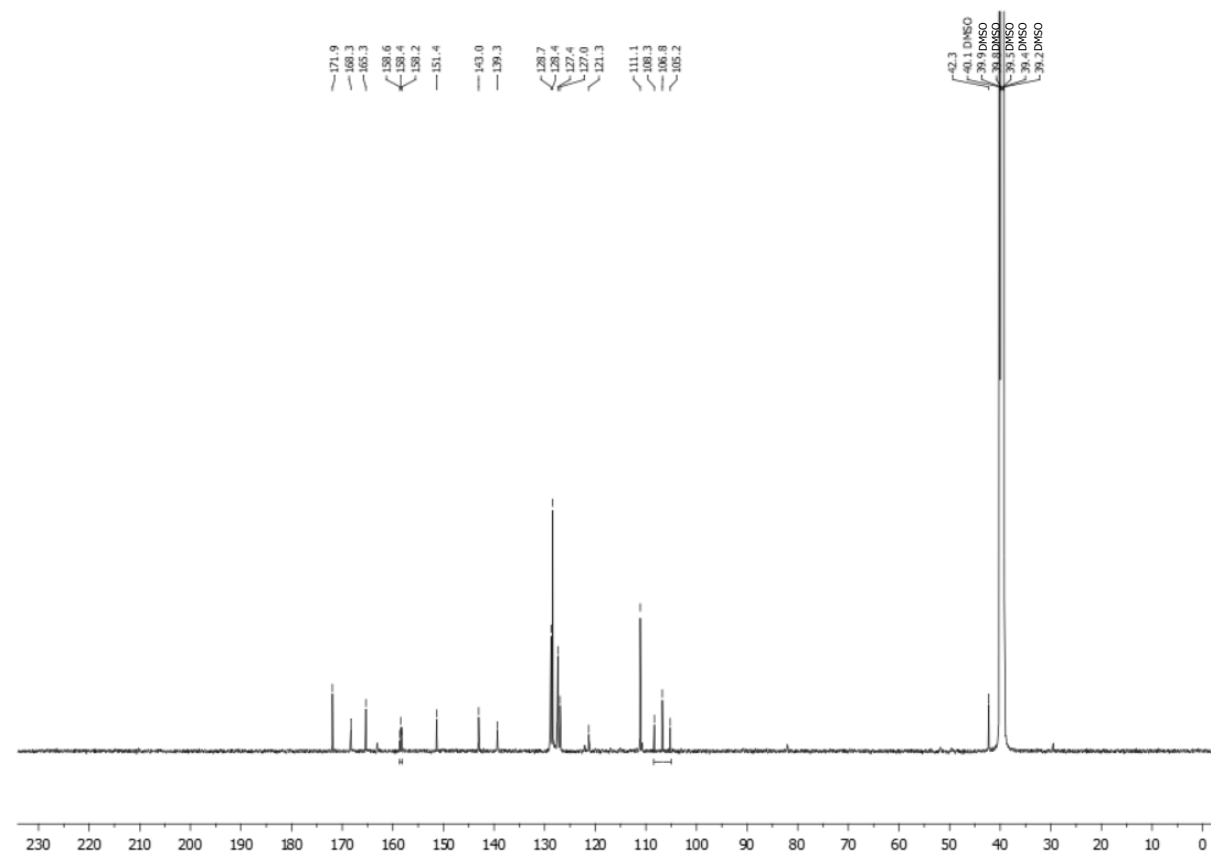

**$^{19}\text{F}$  NMR spectrum of **12** (565 MHz,  $\text{DMSO-}d_6$ )**

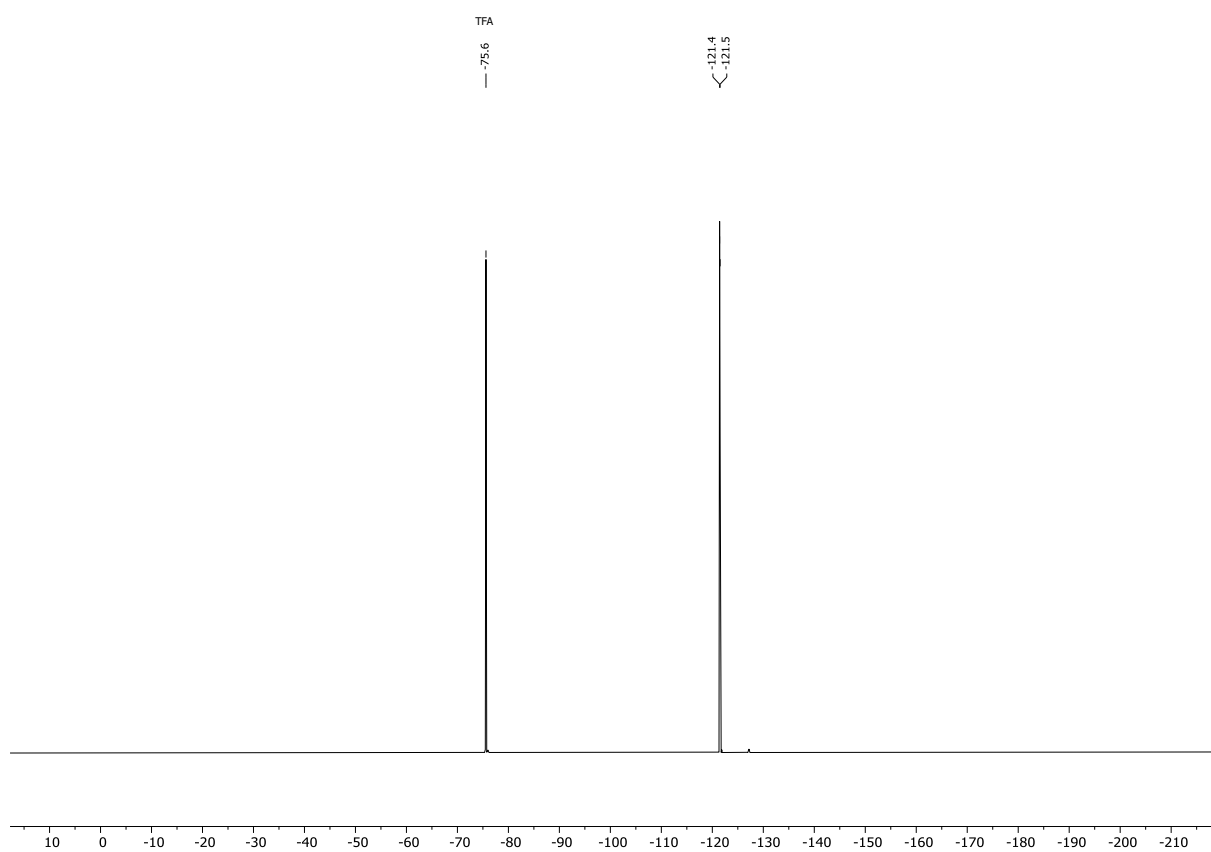

**<sup>1</sup>H NMR spectrum of 13 (600 MHz, DMSO-*d*<sub>6</sub>)**

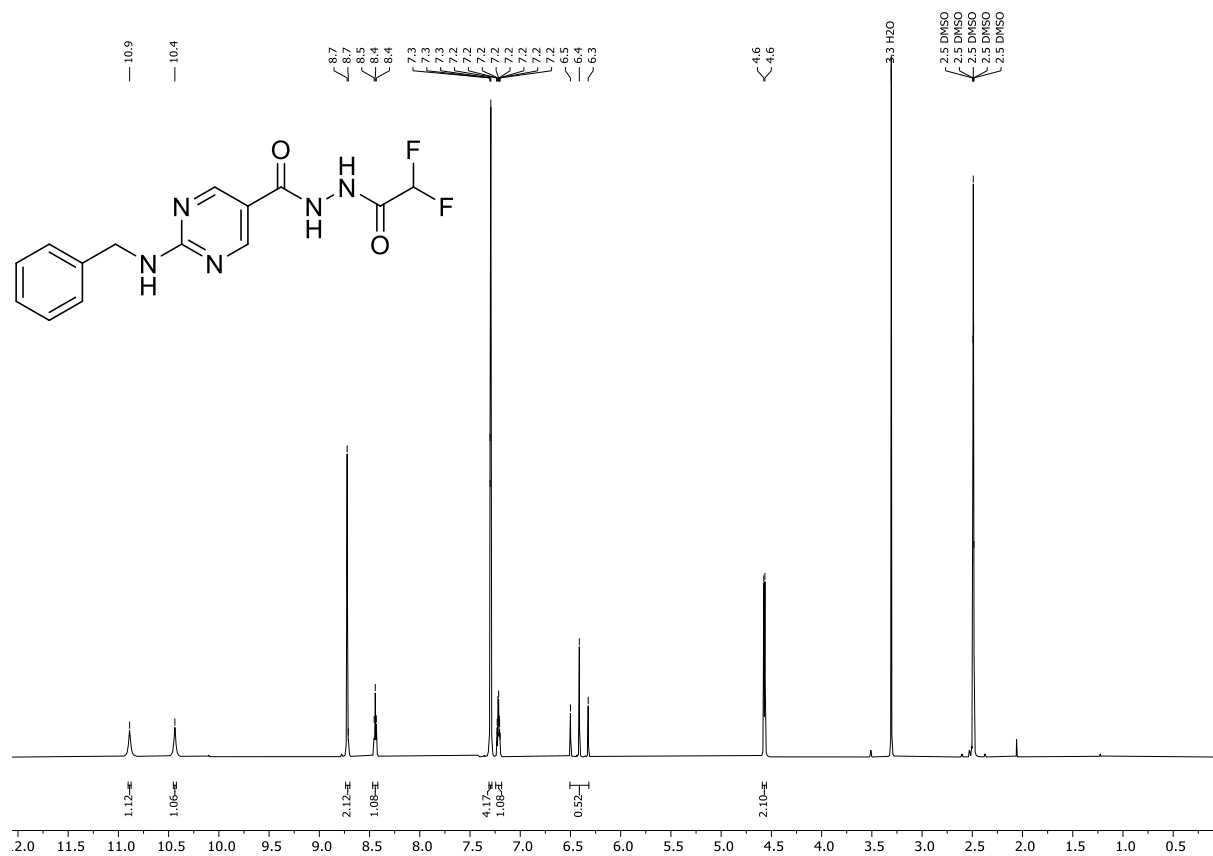

**<sup>13</sup>C NMR spectrum of 13 (151 MHz, DMSO-*d*<sub>6</sub>)**

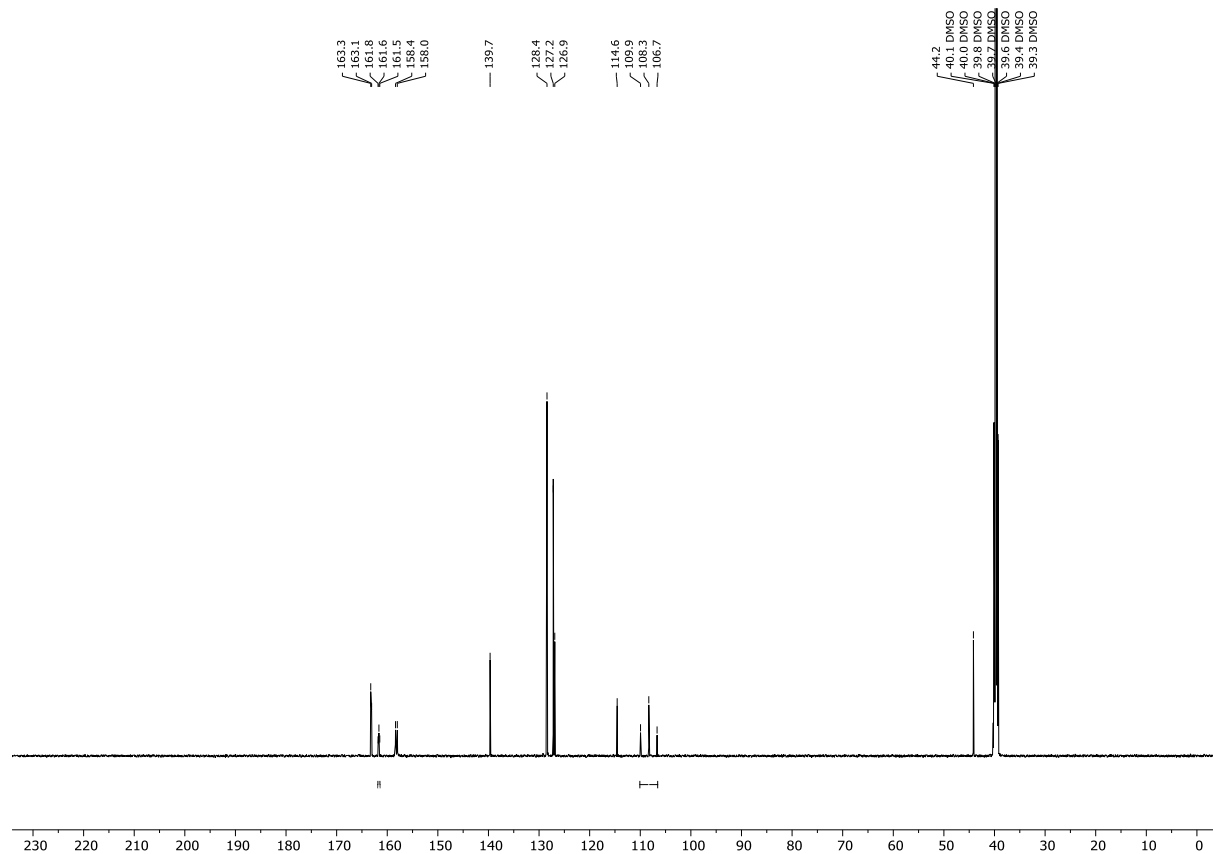

**$^{19}\text{F}$  NMR spectrum of **13** (565 MHz,  $\text{DMSO-}d_6$ )**

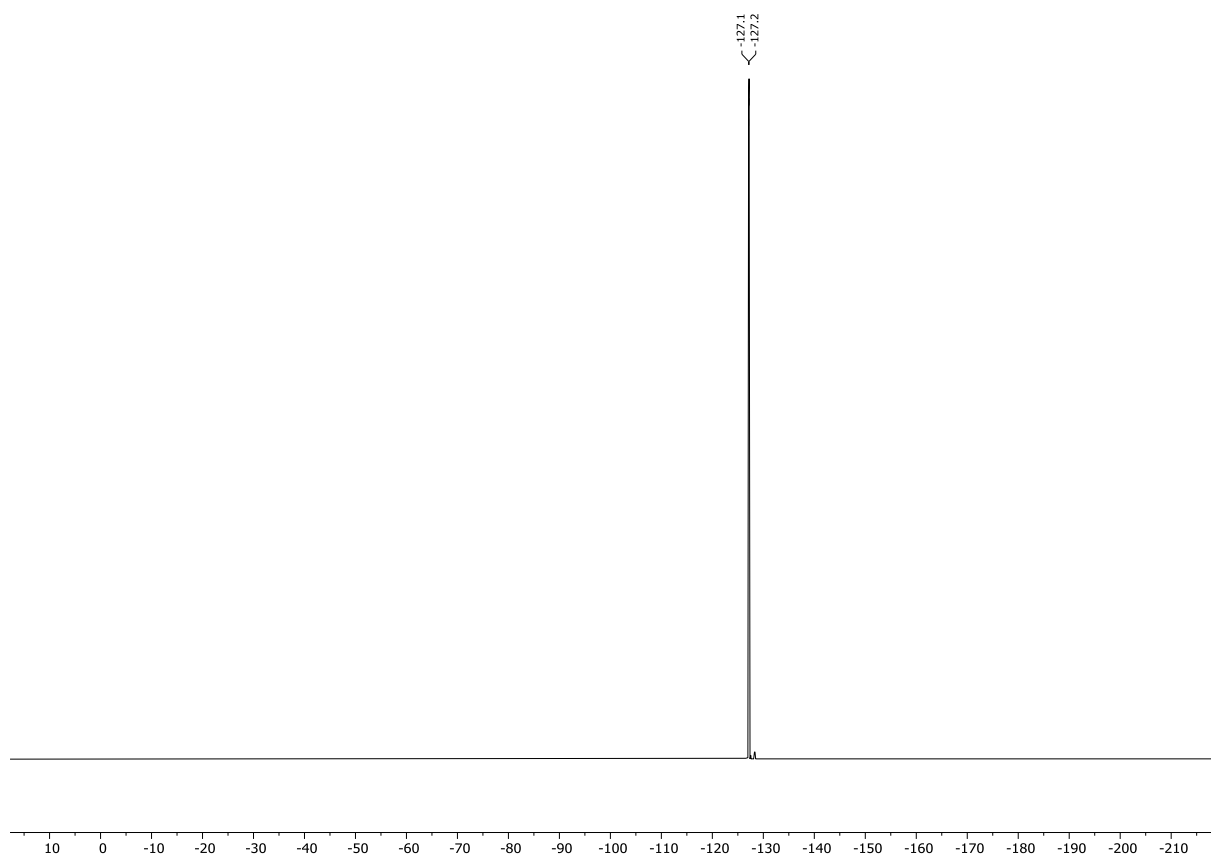

**<sup>1</sup>H NMR spectrum of 14 (600 MHz, DMSO-*d*<sub>6</sub>)**

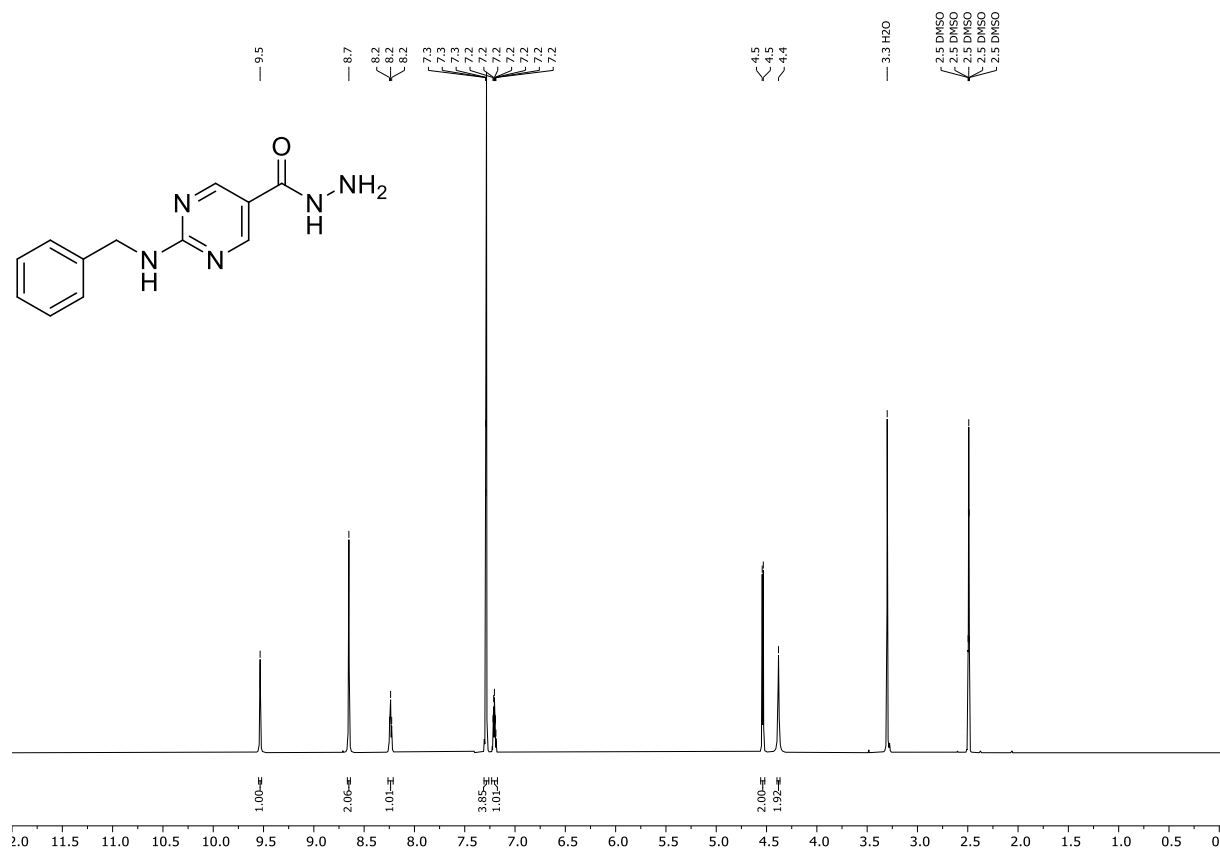

**<sup>13</sup>C NMR spectrum of 14 (151 MHz, DMSO-*d*<sub>6</sub>)**

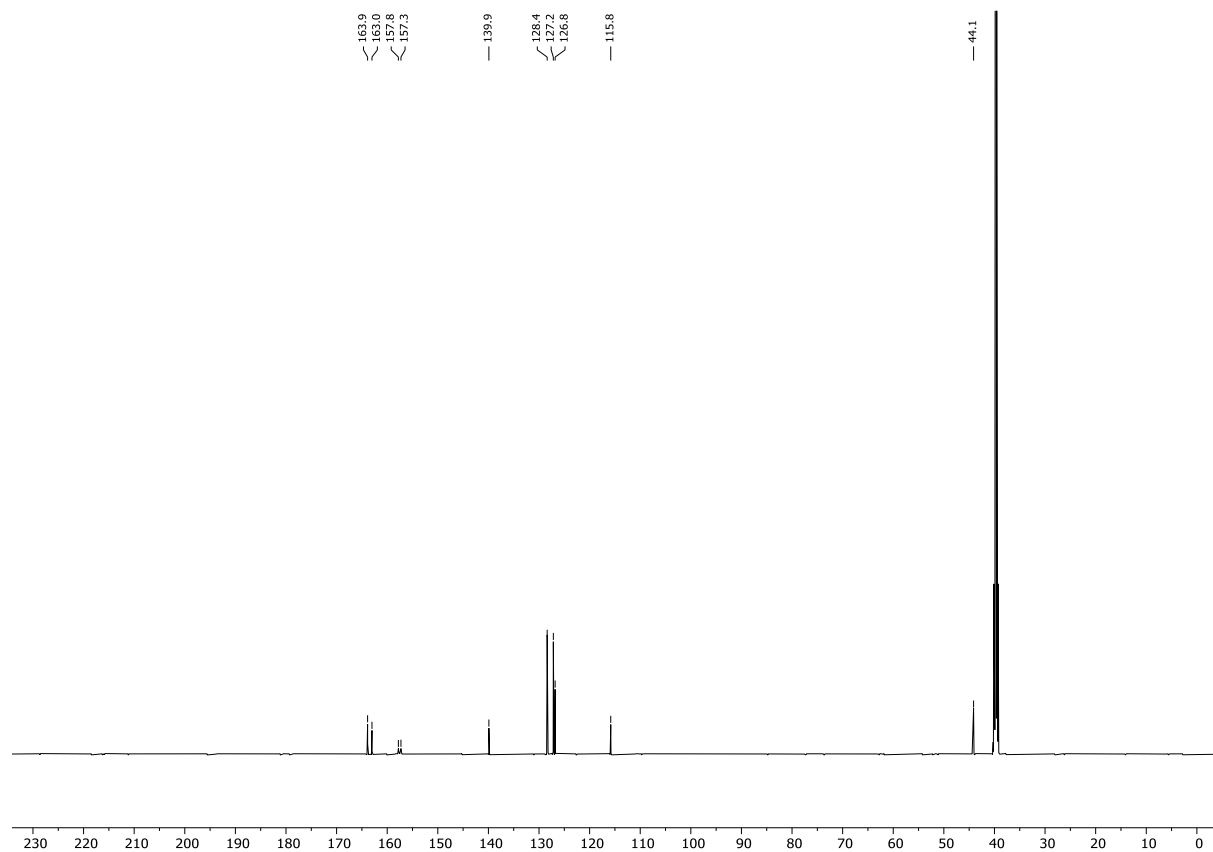





**<sup>1</sup>H NMR spectrum of 16 (500 MHz, DMSO-*d*<sub>6</sub>)**

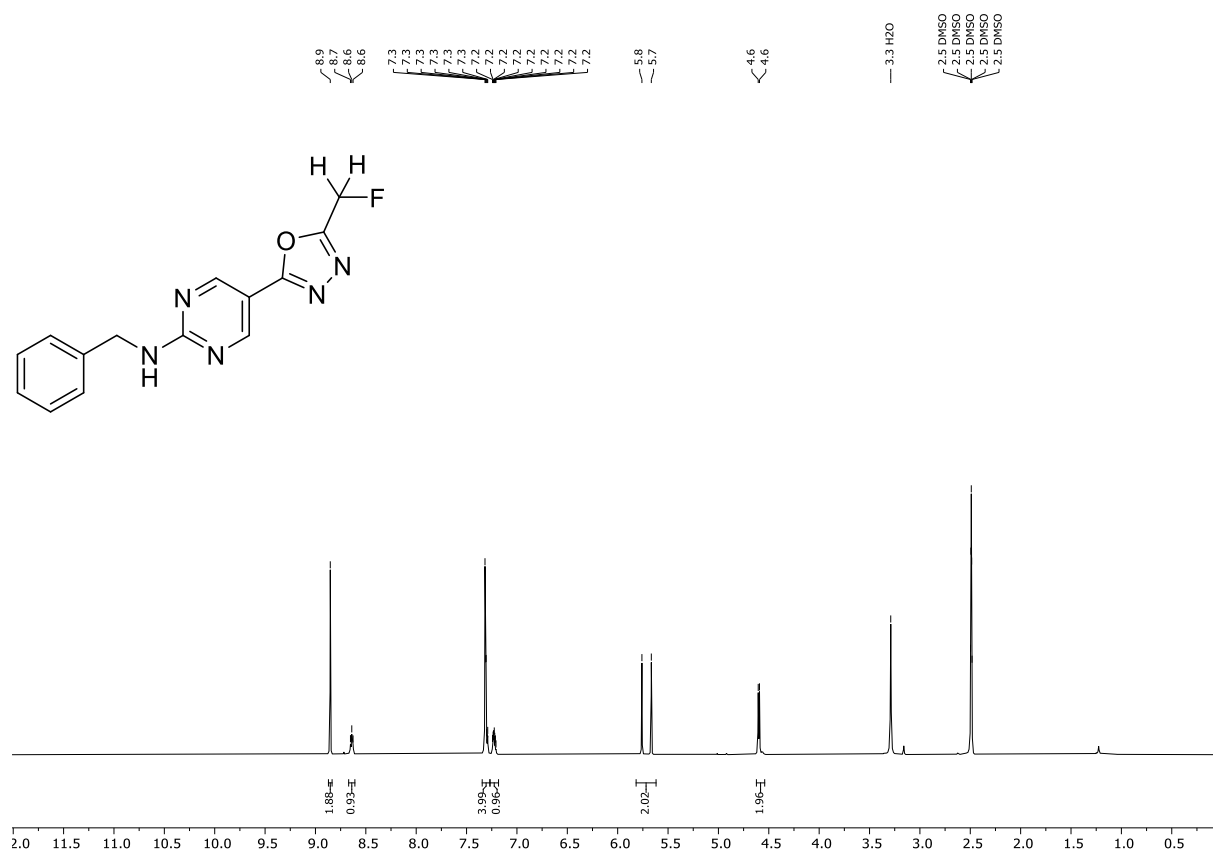

**<sup>13</sup>C NMR spectrum of 16 (126 MHz, DMSO-*d*<sub>6</sub>)**

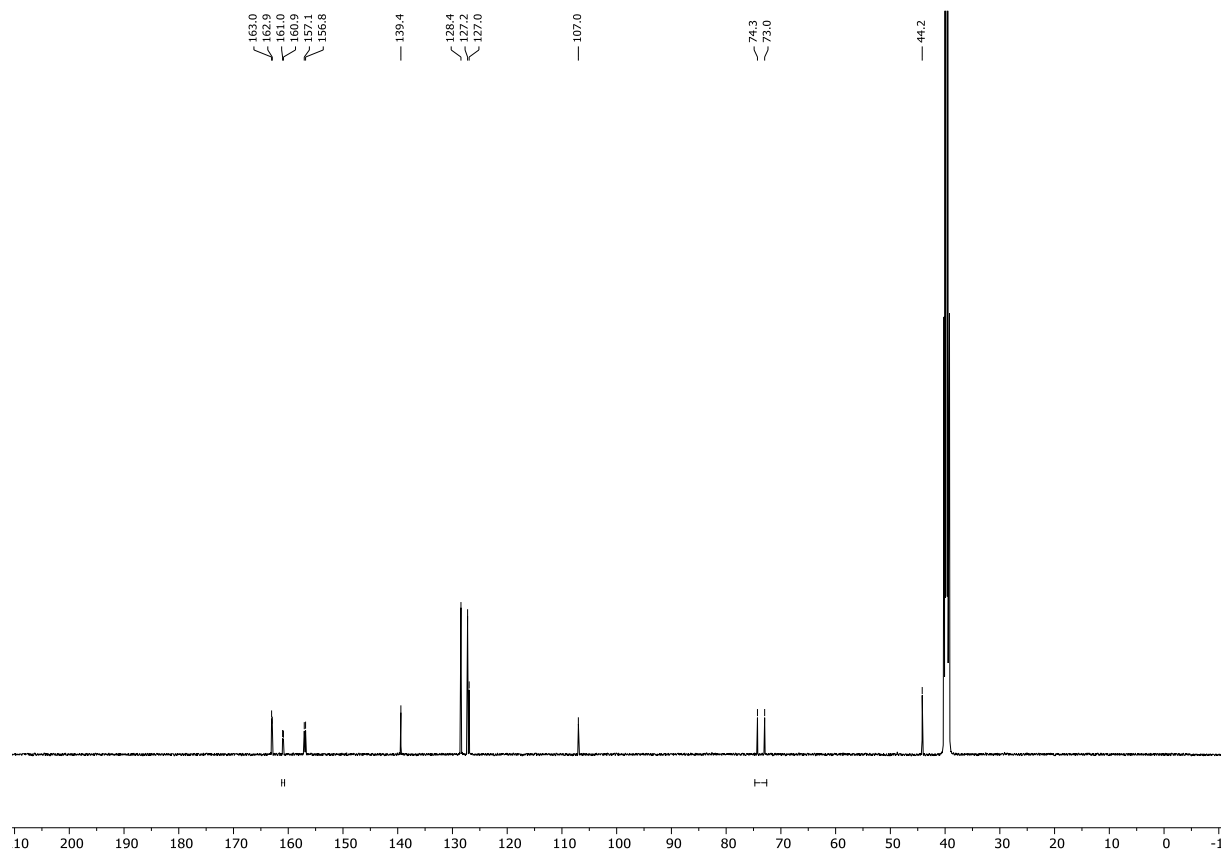

$^{19}\text{F}$  NMR spectrum of **16** (471 MHz,  $\text{DMSO-}d_6$ )

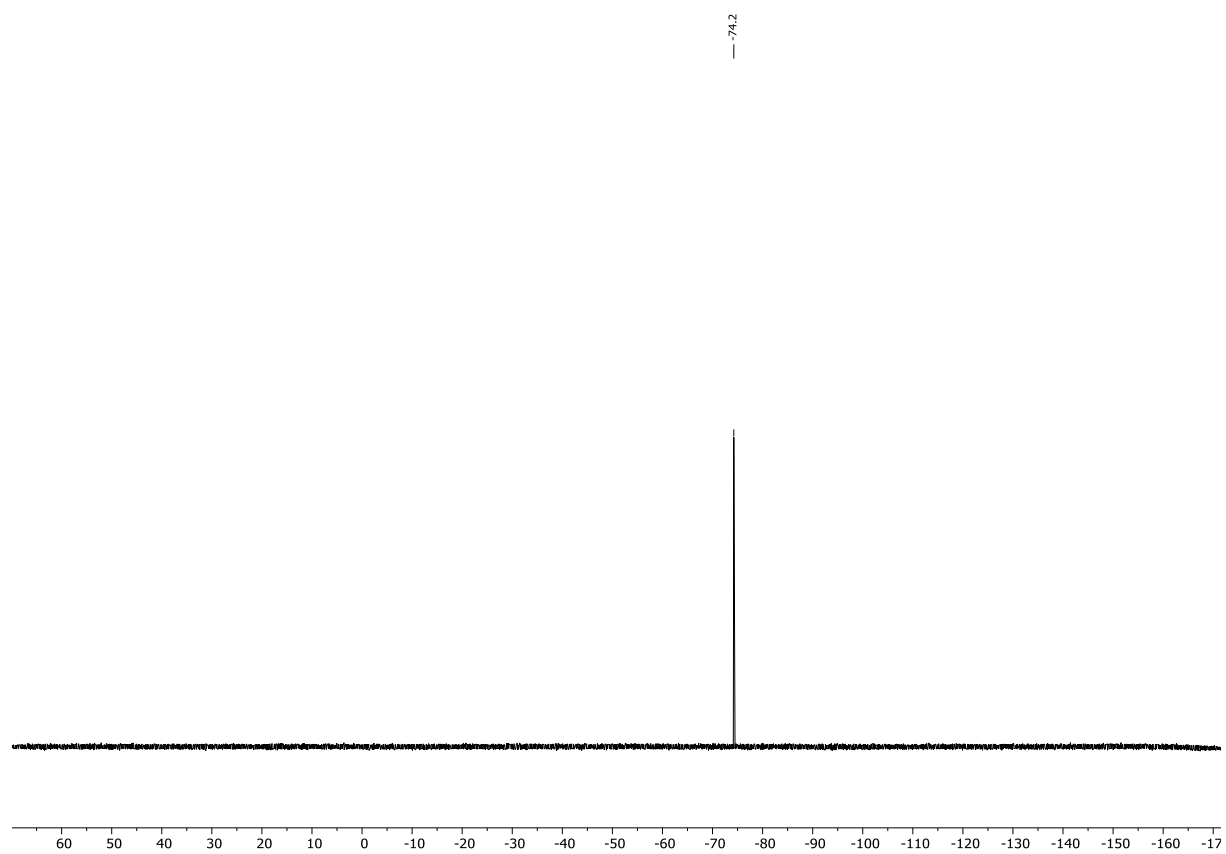

# <sup>1</sup>H NMR spectrum of 17 (600 MHz, DMSO-d<sub>6</sub>)

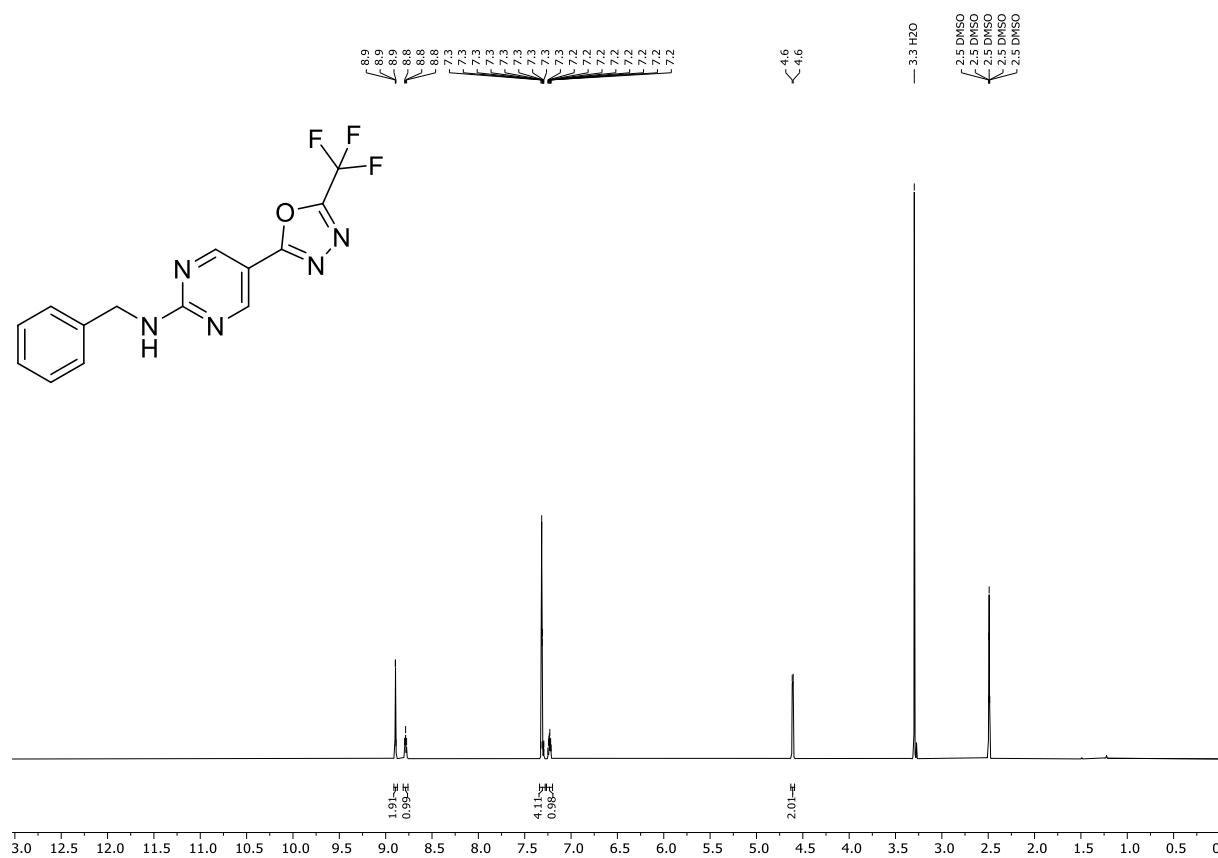

# <sup>13</sup>C NMR spectrum of 17 (151 MHz, DMSO-d<sub>6</sub>)

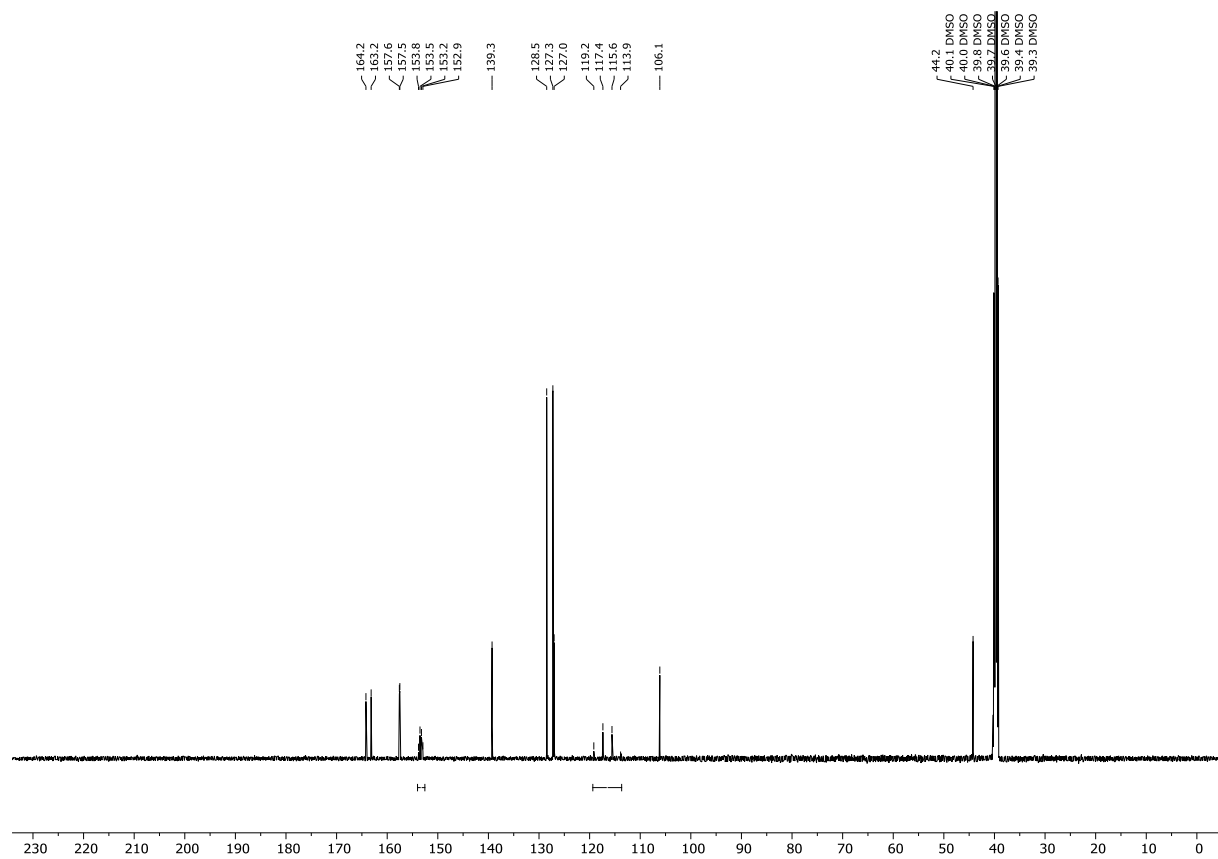

$^{19}\text{F}$  NMR spectrum of **17** (565 MHz,  $\text{DMSO-}d_6$ )

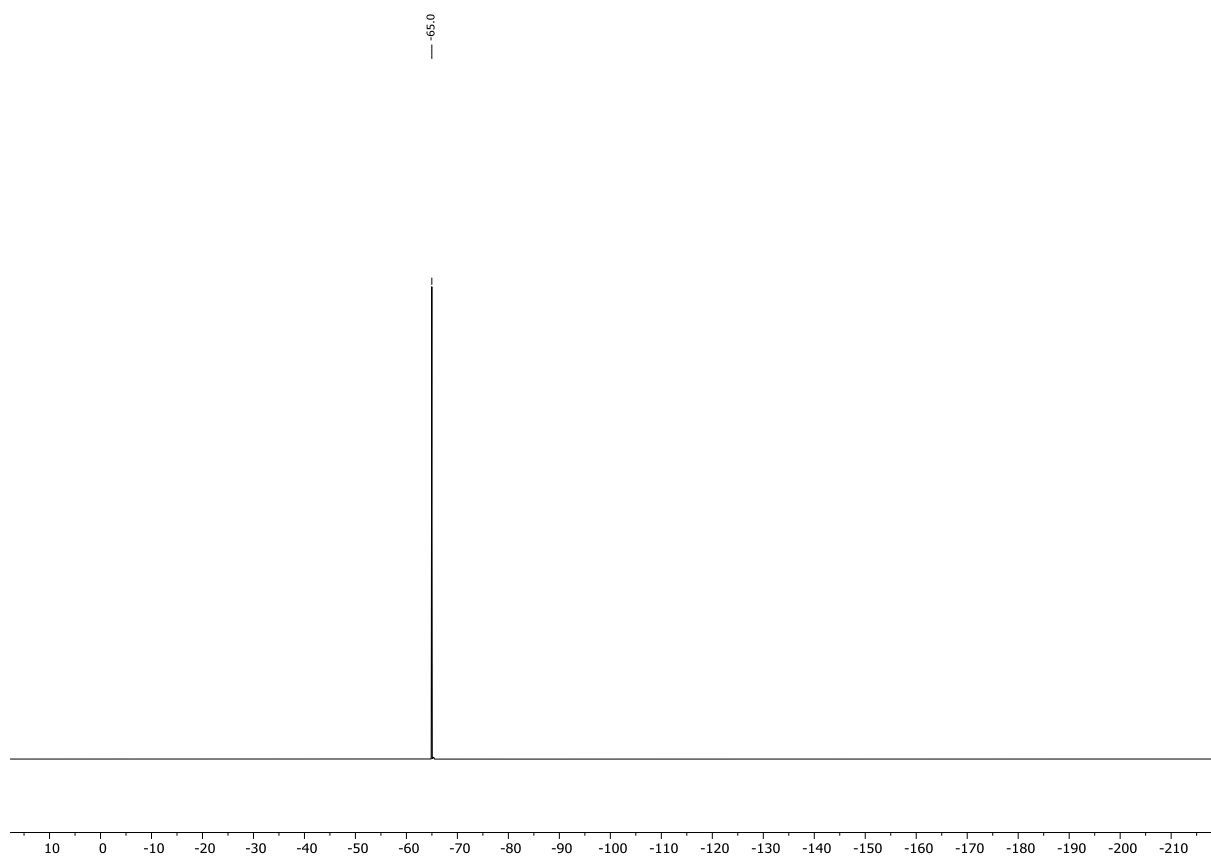

**<sup>1</sup>H NMR spectrum of 18 (600 MHz, DMSO-*d*<sub>6</sub>)**

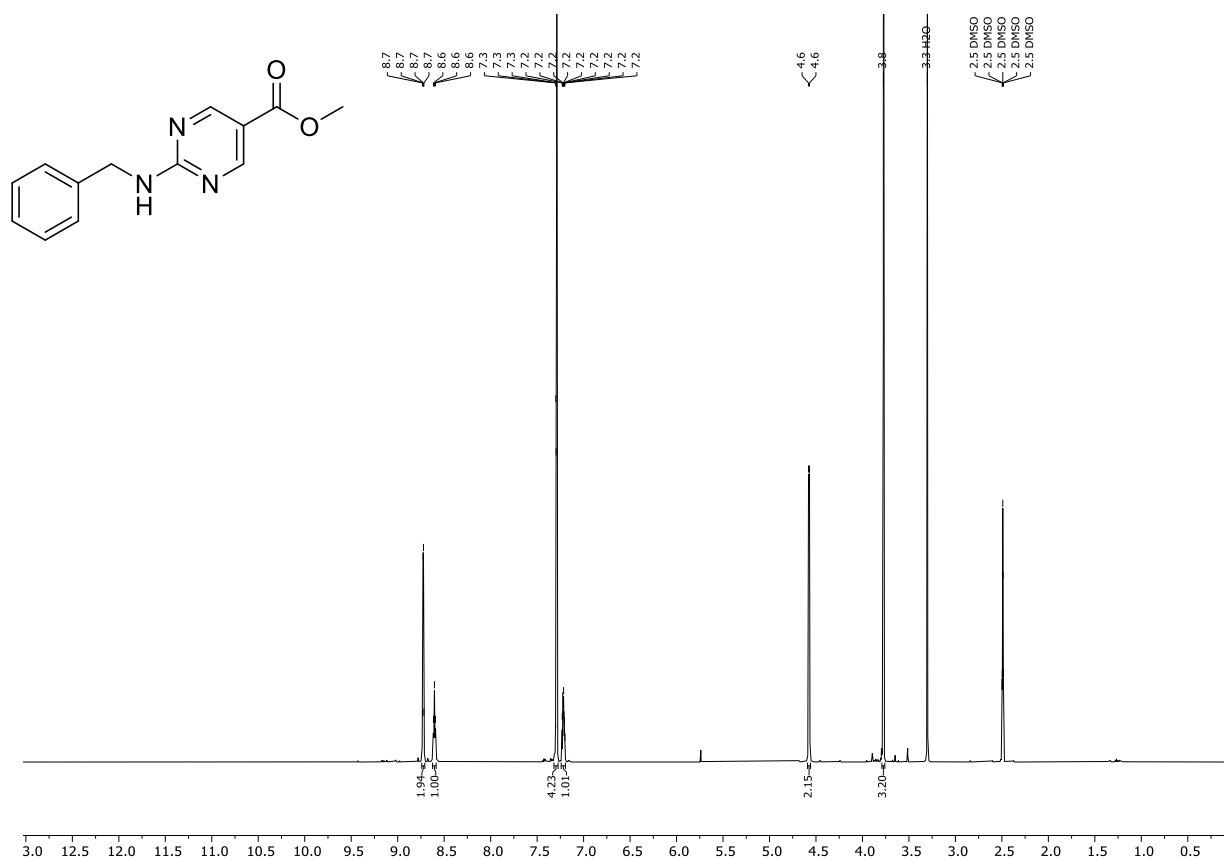

**<sup>13</sup>C NMR spectrum of 18 (151 MHz, DMSO-*d*<sub>6</sub>)**

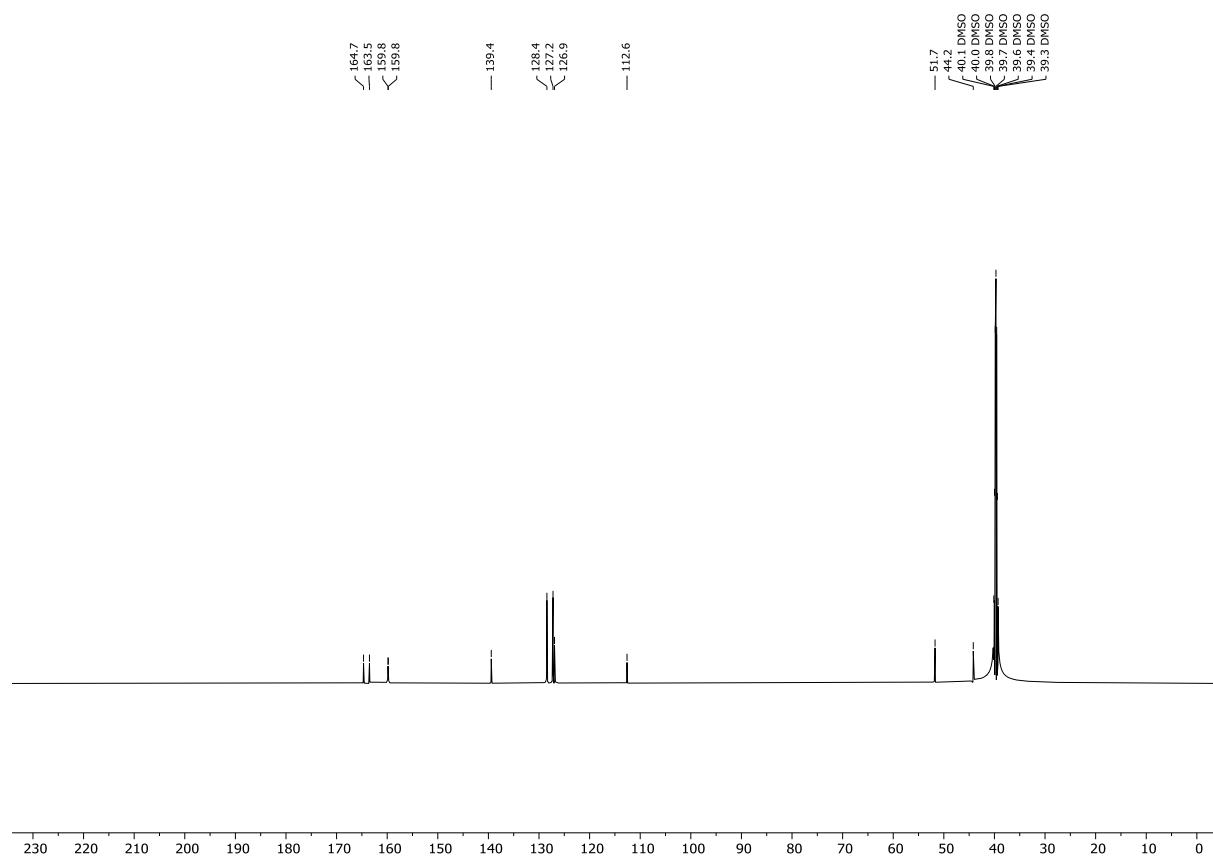

**<sup>1</sup>H NMR spectrum of 19 (600 MHz, CDCl<sub>3</sub>)**

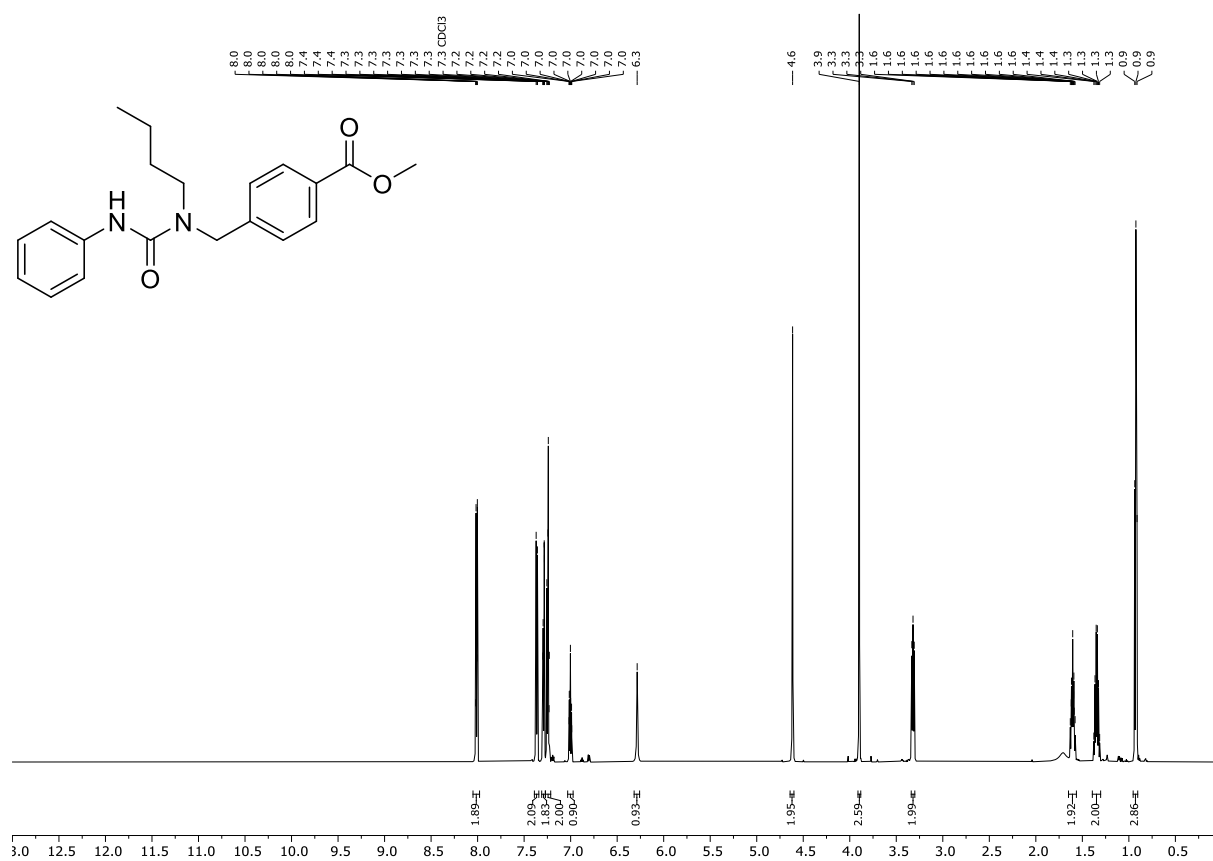

**<sup>13</sup>C NMR spectrum of 19 (151 MHz, CDCl<sub>3</sub>)**

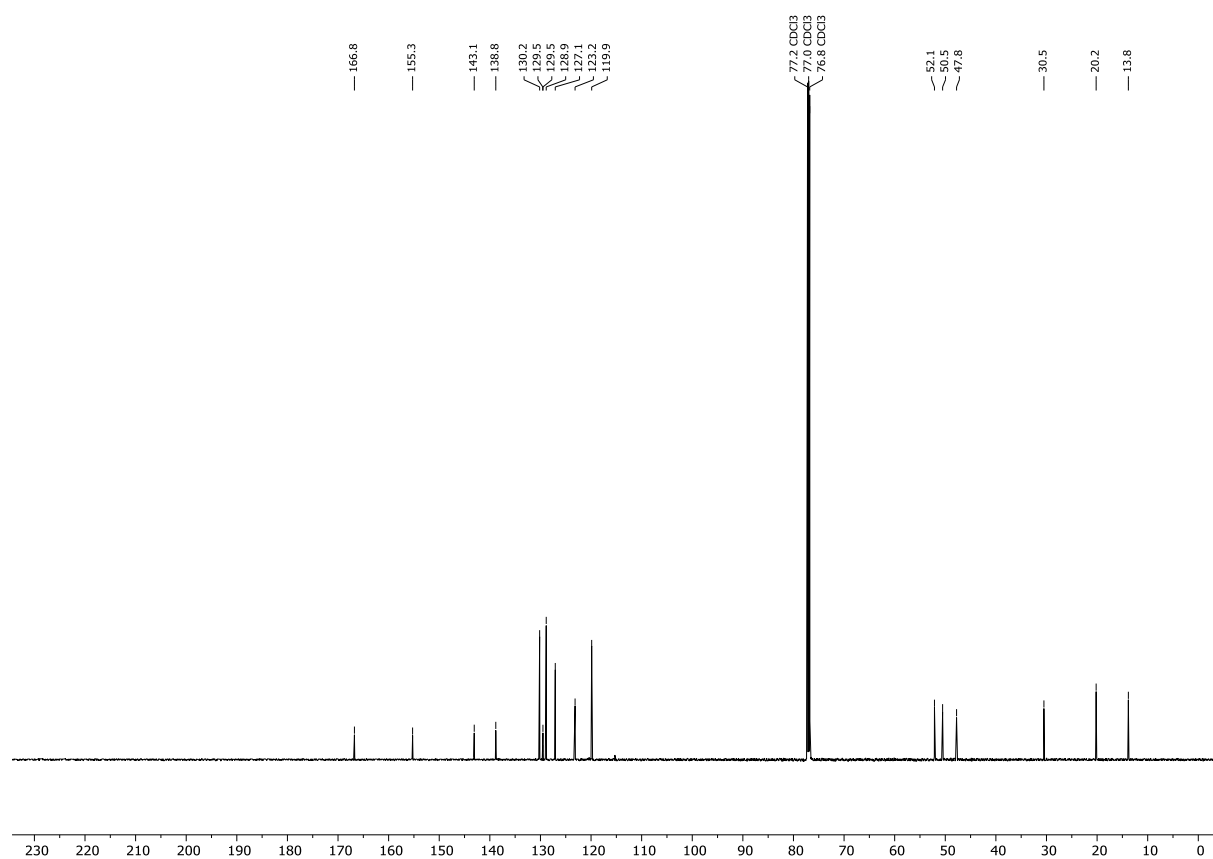

### 3 HPLC Chromatograms

HPLC chromatogram of **6**.

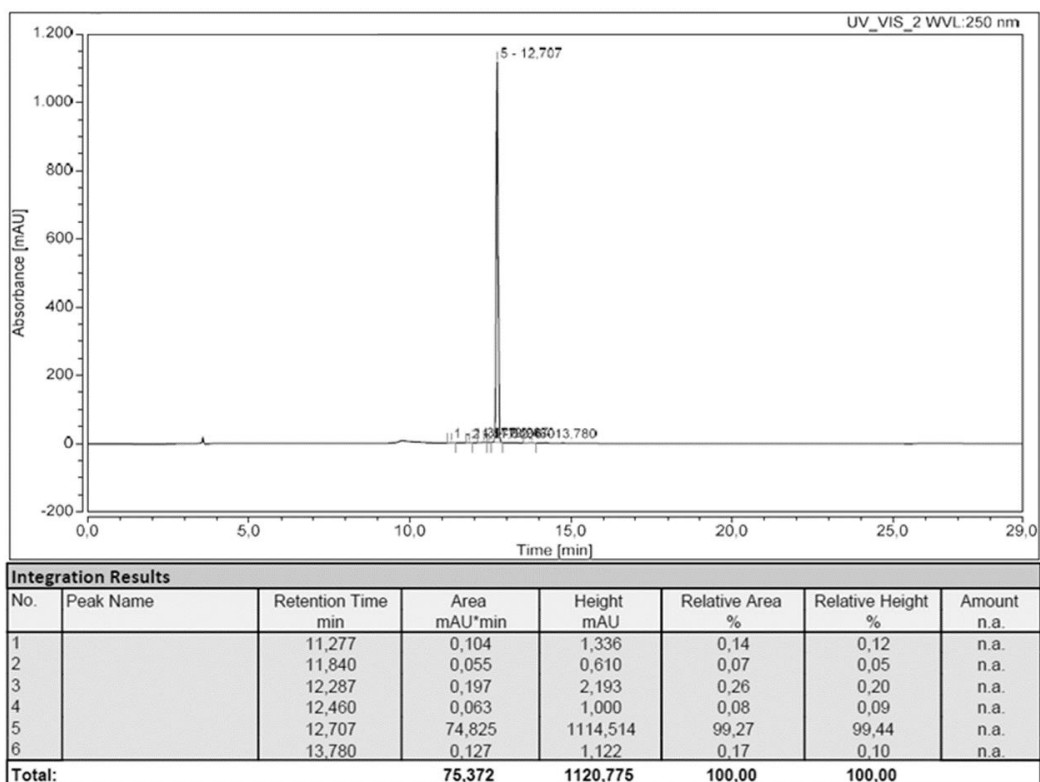

HPLC chromatogram of **9**.

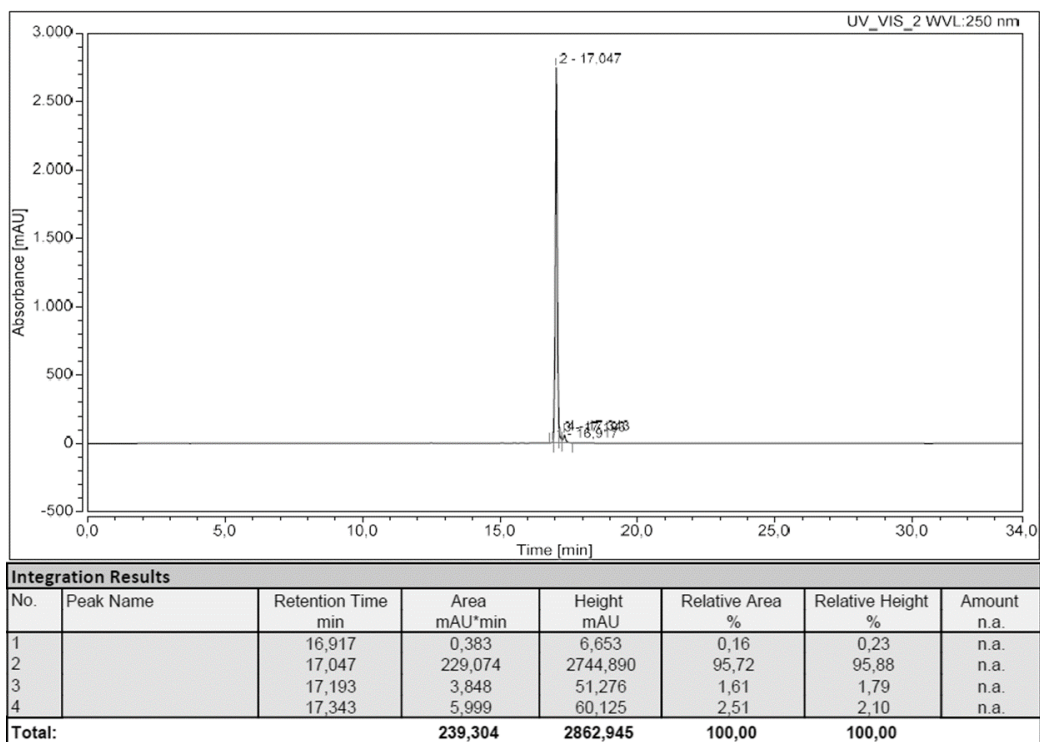

### HPLC chromatogram of 10.

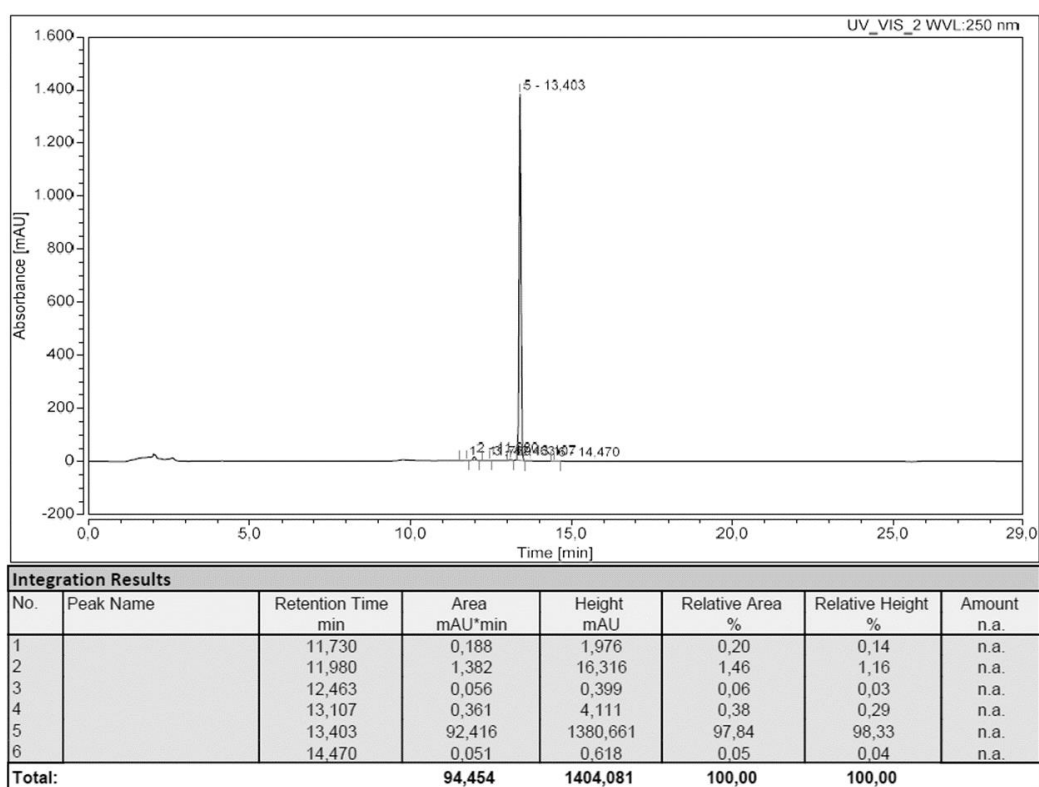

### HPLC chromatogram of 12.

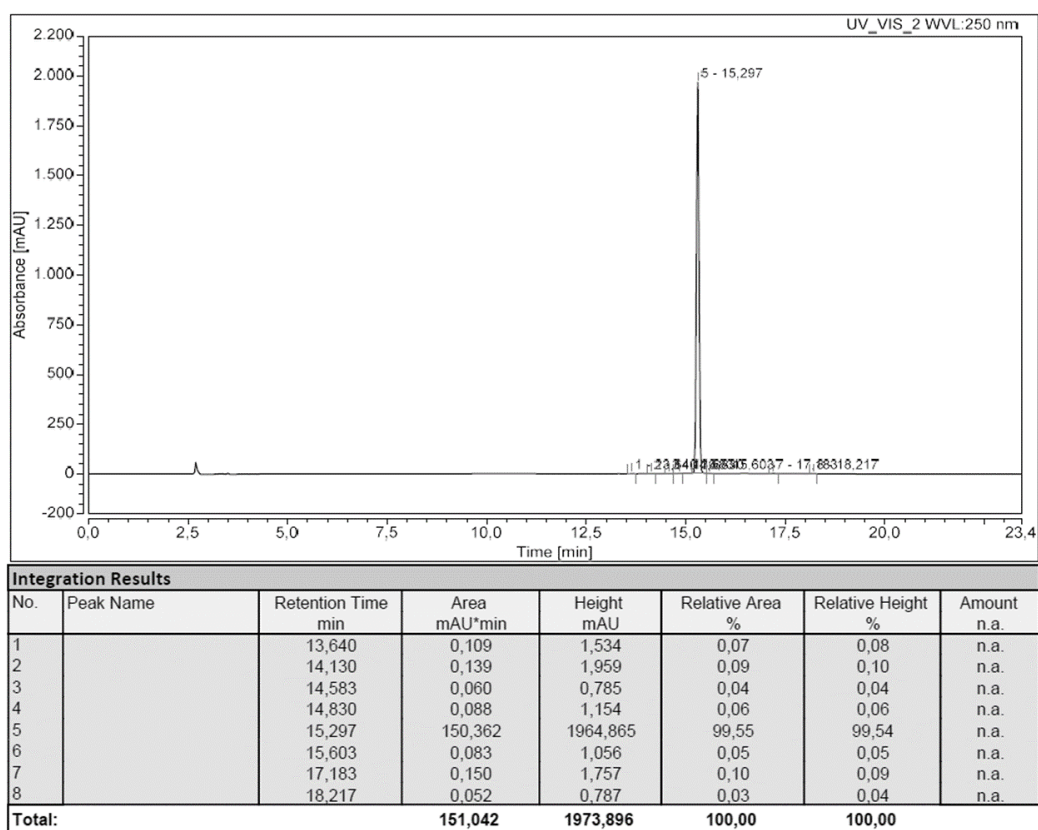



### HPLC chromatogram of 13.

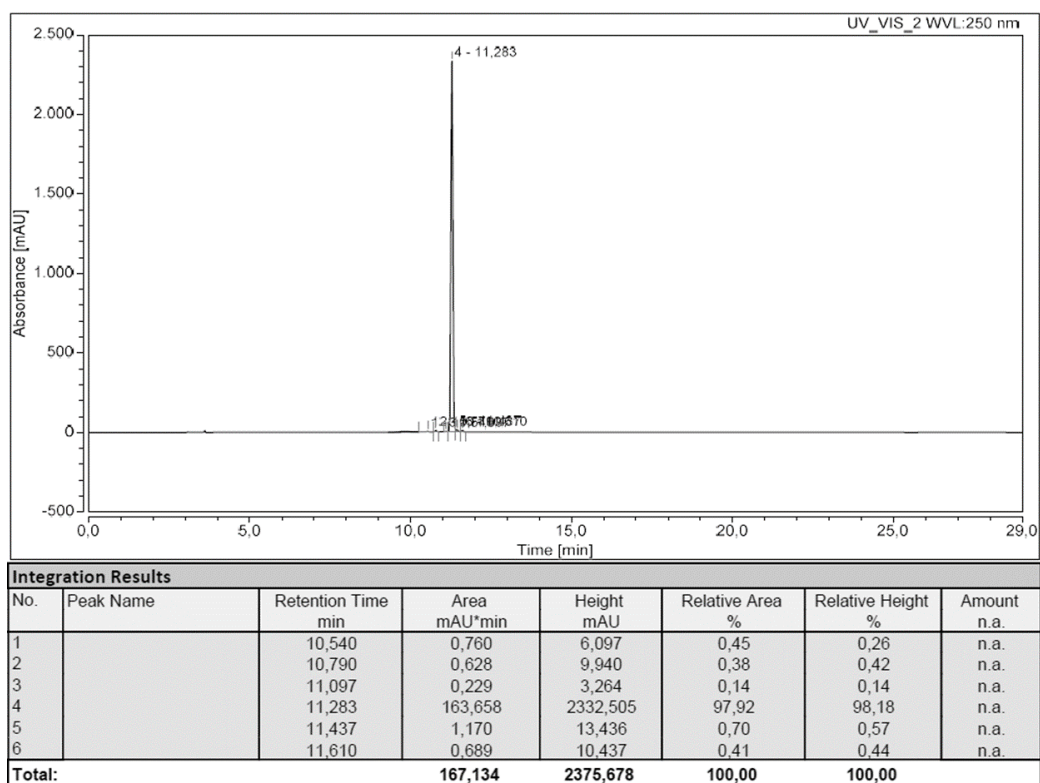

### HPLC chromatogram of 14.

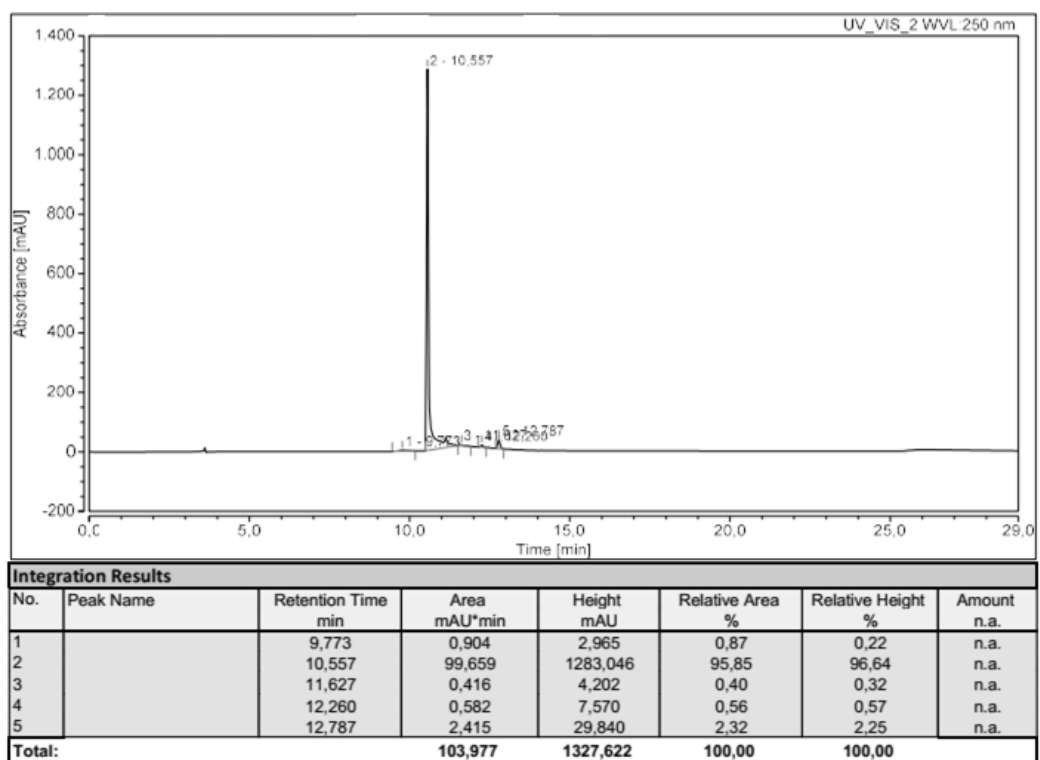

### HPLC chromatogram of 15.

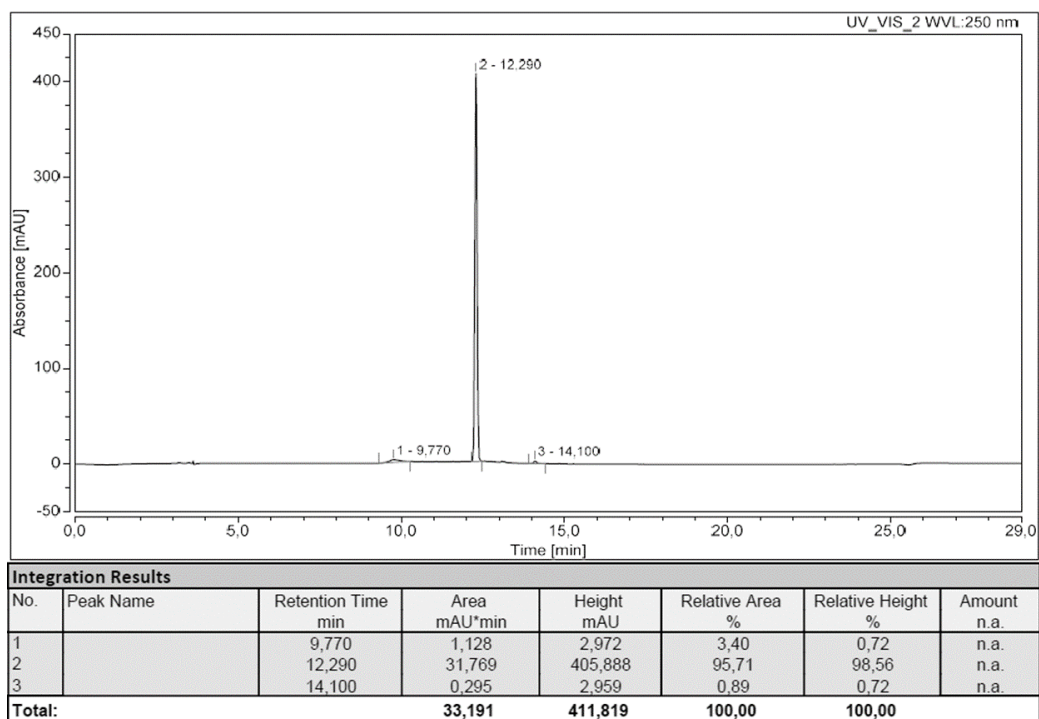

### HPLC chromatogram of 16.

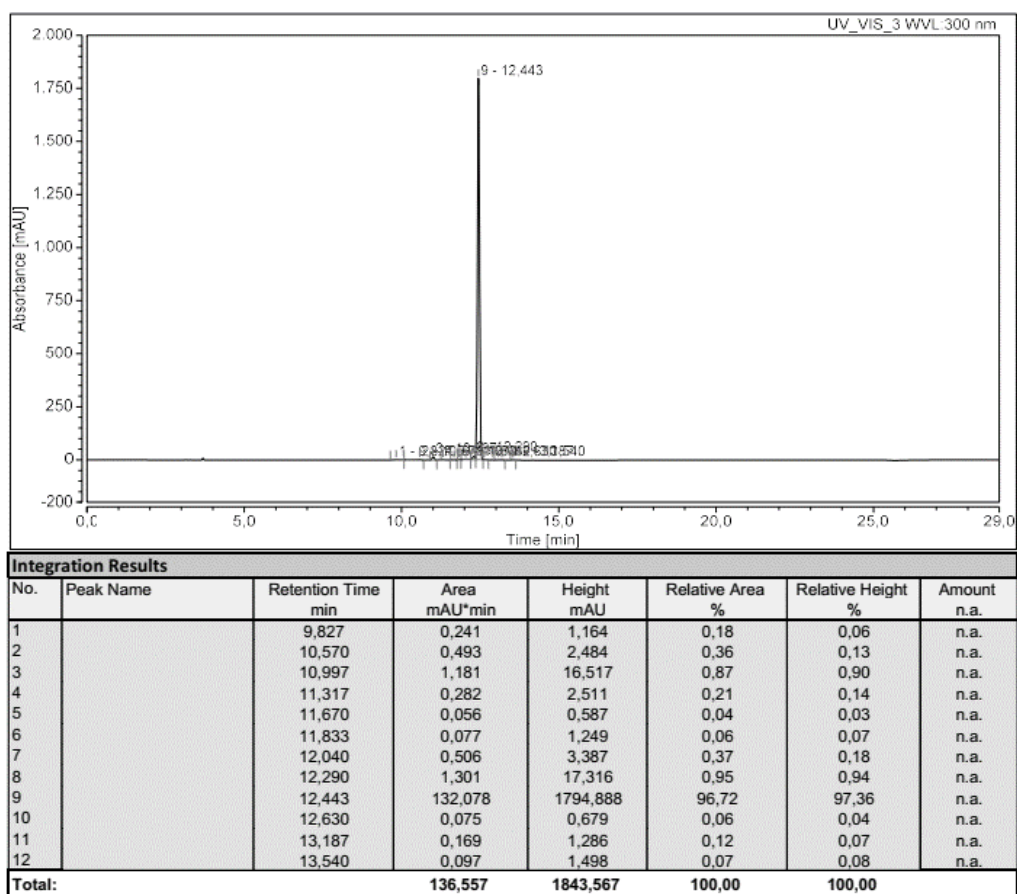

HPLC chromatogram of 17.

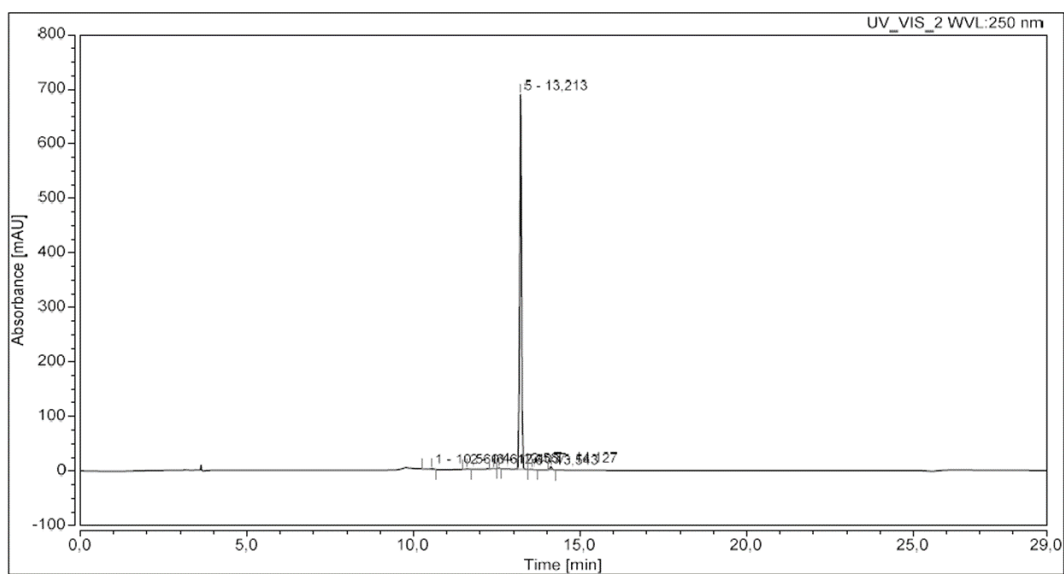

| Integration Results |           |                       |                 |                |                    |                      |                |
|---------------------|-----------|-----------------------|-----------------|----------------|--------------------|----------------------|----------------|
| No.                 | Peak Name | Retention Time<br>min | Area<br>mAU*min | Height<br>mAU  | Relative Area<br>% | Relative Height<br>% | Amount<br>n.a. |
| 1                   |           | 10,560                | 0,283           | 2,011          | 0,63               | 0,29                 | n.a.           |
| 2                   |           | 11,617                | 0,096           | 1,234          | 0,21               | 0,18                 | n.a.           |
| 3                   |           | 12,403                | 0,079           | 0,833          | 0,18               | 0,12                 | n.a.           |
| 4                   |           | 12,567                | 0,149           | 2,399          | 0,33               | 0,34                 | n.a.           |
| 5                   |           | 13,213                | 43,425          | 687,496        | 97,30              | 97,94                | n.a.           |
| 6                   |           | 13,543                | 0,125           | 1,441          | 0,28               | 0,21                 | n.a.           |
| 7                   |           | 14,127                | 0,473           | 6,510          | 1,06               | 0,93                 | n.a.           |
| <b>Total:</b>       |           |                       | <b>44,629</b>   | <b>701,925</b> | <b>100,00</b>      | <b>100,00</b>        |                |

#### 4 References

- (1) Yung-Chi, C.; Prusoff, W. H. Relationship between the Inhibition Constant (KI) and the Concentration of Inhibitor which causes 50 per cent Inhibition (I50) of an Enzymatic Reaction. *Biochem. Pharmacol.* **1973**, *22*, 3099–3108.
- (2) Schäker-Hübner, L.; Haschemi, R.; Büch, T.; Kraft, F. B.; Brumme, B.; Schöler, A.; Jenke, R.; Meiler, J.; Aigner, A.; Bendas, G.; Hansen, F. K. Balancing Histone Deacetylase (HDAC) Inhibition and Drug-Likeness: Biological and Physicochemical Evaluation of Class I Selective HDAC Inhibitors. *ChemMedChem* **2022**, *17*, e202100755.
